# Supplementary material
Source: PubMed Central journal article supplement (PMC3457809)
Supplement: NIHMS255779-supplement-Supp_Fig_S1-S___Table_S1-_S7.pdf [file NIHMS255779-supplement-Supp_Fig_S1-S___Table_S1-_S7.pdf]

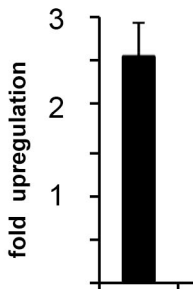

Fig. S1. *gata1* is 2.57-fold upregulated in the *rpl11* mutant in comparison to siblings at 48 hpf. qPCR RNA was pooled from 30 mutant or sibling embryos

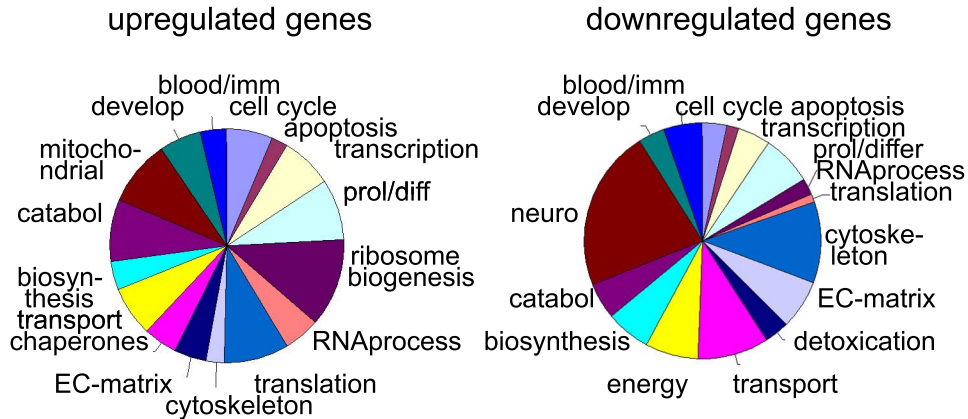

**Fig. S2. rpl11 mutant had changes in expression of hundreds of genes.** Among upregulated genes, the biggest fraction was represented by genes involved in ribosome biogenesis, RNA processing, and translation. Also, genes involved in catabolism and mitochondrial functions were mostly upregulated. Among downregulated genes the largest group were genes participating in the development and function of the nervous system, and followed by structural genes involved in cytoskeleton and extracellular matrix. Cutoff of 1.5 fold was used to make the chart..

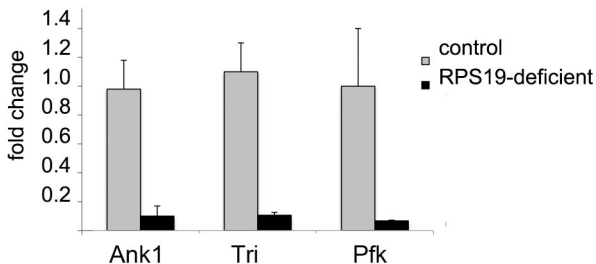

**Fig. S3.** RPS19-deficient mouse fetal liver cells downregulated expression of a structural protein ank1 and glycolytic enzymes Tri and Pfk

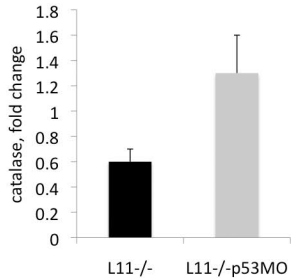

**Fig. S4 Inhibition of p53 resulted in normalization of expression of many dysregulated genes.**

Expression of a detoxifying enzyme catalase was downregulated in the mutant. p53 inhibition led to increase in catalase expression.

### **Figure legend to Supplementary tables 1-6.**

To uncover pathways affected in the *rpl11* mutant we manually analyzed microarray data using different cutoffs. Unfortunately, programs for finding pathways such as Ingenuity, do not work on zebrafish data because of insufficient annotation of zebrafish genes. We started from cutoff 3, then 2, 1.5, and 1.3. After finding that a particular pathway was affected, we used lower cutoff to see what happens with other genes from the same pathway. Often, genes from the same pathway showed changes in the same direction, and then we included them into the tables. For example, 3 mitochondrial ribosomal proteins show upregulation >2 fold but another 29 are upregulated from 1.3 to 1.9 fold. We think that it is more informative to show all these 32 genes instead of showing only 3, then you can see a trend. Another example eIFs, 21 from 23 present on the array show upregulation, only 3 are upregulated >2 fold. Again, we included all, even with smaller changes since it reveals the trend. The same is true for other pathways; some of them are discussed in the paper.

## Supplementary Table 1.

Changes in expression of genes involved in regulation of cell cycle, transcription, proliferation, and apoptosis

| genes                                                                                                      | fold | function                                                       |
|------------------------------------------------------------------------------------------------------------|------|----------------------------------------------------------------|
| CELL CYCLE, CHROMATIN, REPLICATION                                                                         |      |                                                                |
| ccnd1 /// LOC562165: cyclin D1                                                                             | +1.9 | promotes cell cycle                                            |
| ccng1: cyclin G1                                                                                           | +2.1 | inhibit cell cycle                                             |
| ccng2: cyclin G2                                                                                           | -3.1 | inhibitor, suppressed by mitogenic factors                     |
| ccni: cyclin I                                                                                             | -2.1 | function unknown, increased in cancer                          |
| ccn1: cyclin L1                                                                                            | +1.3 | affects splicing                                               |
| cdc25b: cell division cycle 25 homolog B (S. pombe)                                                        | +2   | promotes cell cycle                                            |
| cdc34: cell division cycle 34 homolog (S. cerevisiae)                                                      | -1.7 |                                                                |
| cdc2: cell division cycle 2                                                                                | -1.4 | G1 to S and G2 to M transition                                 |
| clk4: CDC-like kinase 4                                                                                    | -1.7 |                                                                |
| orc3l: origin recognition complex, subunit 3-like (yeast)                                                  | +2   | DNA replication                                                |
| tipin: timeless interacting protein                                                                        | +2   | progression of S-phase                                         |
| skp2: S-phase kinase-associated protein 2 (p45)                                                            | +2   | ubiquitination CDKN1B/p27kip G1/S trans                        |
| drg2: developmentally regulated GTP binding protein 2                                                      | +2   | inhibits C2/M progression                                      |
| tfdp2: transcription factor Dp-2                                                                           | +1.9 | E2F partner, G1 to S phase control                             |
| tfdp1: transcription factor Dp-1                                                                           | +1.5 |                                                                |
| cdc123: cell division cycle 123 homolog (S. cerevisiae)                                                    | +1.8 | required for S phase entry                                     |
| plk3: polo-like kinase 3 (Drosophila)                                                                      | +1.8 | M phase, phosphorylate CDC25C                                  |
| rcc1: regulator of chromosome condensation 1                                                               | +1.6 | chromosome condensation in the S phase                         |
| smarcd1: SWI/SNF related, matrix associated, actin dependent regulator of chromatin, subfamily d, member 1 | +1.3 | regulator of chromatin                                         |
| gspt1: G1 to S phase transition 1                                                                          | +1.6 | cell cycle, translation                                        |
| e2f4: E2F transcription factor 4, p107/p130-binding                                                        | +1.4 | cell cycle                                                     |
| rcc2: regulator of chromosome condensation 2                                                               | -1.6 | required for completion of mitosis and cytokinesis             |
| pak2: p21 protein (Cdc42/Rac)-activated kinase 2                                                           | +1.3 | replication                                                    |
| orc3l: origin recognition complex, subunit 3-like (yeast)                                                  | +2   | chromosome condensation                                        |
| snhg3-rcc1: SNHG3-RCC1 readthrough transcript                                                              | +1.6 | early step in replication initiation                           |
| rpa1: replication protein A1, 70kDa                                                                        | +1.3 | initiation of eukaryotic genome replication                    |
| mcm3: minichromosome maintenance complex comp. 3                                                           | +1.3 |                                                                |
| mcm4: minichromosome maintenance complex comp. 4                                                           | +1.4 |                                                                |
| pwp2: PWP2 periodic tryptophan protein homolog                                                             | +2.3 | a role in the early G1 phase of the cell cycle                 |
| pwp1: PWP1 homolog (S. cerevisiae)                                                                         | +2.4 |                                                                |
| ppapdc1b: phosphatidic acid phosphatase type 2 domain containing 1B                                        | -1.7 | negative regulation of cell cycle                              |
| pds5a: PDS5, regulator of cohesion maintenance, hom. A                                                     | +1.3 | regulation of sister chromatid cohesion                        |
| nuf2: NUF2, NDC80 kinetochore complex component, homolog (S. cerevisiae)                                   | +1.7 | centromere                                                     |
| ncapg: non-SMC condensin I complex, subunit G                                                              | +1.6 | conversion of interphase chromatin into mitotic-like           |
| ncapd: non-SMC condensin I complex, subunit D                                                              | +1.5 | condense chromosomes                                           |
| hp1bp3: heterochromatin protein 1, binding protein 3                                                       | -1.3 | chromatin structure and function                               |
| hmgbl: high-mobility group box 1                                                                           | -1.3 | binds s.s.DNA, unwind double strand                            |
| fzr1: fizzy/cell division cycle 20 related 1 (Drosophila)                                                  | +1.3 | regulates ubiquitin ligase activity of the anaphase            |
| chd4: chromodomain helicase DNA binding protein 4                                                          | -1.7 | component of the nucleosome remodeling and deacetylase complex |
| pinx1: pin2/trf1-interacting protein 1                                                                     | +2.8 | inhibits telomerase                                            |
| set: SET nuclear oncogene                                                                                  | +1.4 | stimulate DNA replication                                      |
| hcf1: host cell factor C1 (VP16-accessory protein)                                                         | +1.4 | nuclear co-activator, controls cell cycle                      |
| nap1l4 (nucleosome assembly protein 1-like 4)                                                              | +2.1 | chromatin, tumor-suppressor                                    |
| tp53: tumor protein p53                                                                                    | +3.3 | tumor suppressor                                               |
| mdm2: transformed 3T3 cell double minute 2 homolog                                                         | +2.8 | p53 ubiquitinase                                               |
| rchyl: ring finger and CHY zinc finger domain containing 1                                                 | +1.7 | promotes the ubiquitin-mediated proteosomal degradation of p53 |

|                                                                                                                                                                                                                                                                                                                                                                                                                                                                                                                                                                                                                                                                                                                                                                                                                                                                                                                                                                                                                                                                                                                                                                                 |                                                                                                                                                                                                                                       |                                                                                                                                                                                                                                                                                                                                                                                                                                                                                                                                                                                                                                                                                                                                                                                                                                                                                                                                                                                                                                                                       |
|---------------------------------------------------------------------------------------------------------------------------------------------------------------------------------------------------------------------------------------------------------------------------------------------------------------------------------------------------------------------------------------------------------------------------------------------------------------------------------------------------------------------------------------------------------------------------------------------------------------------------------------------------------------------------------------------------------------------------------------------------------------------------------------------------------------------------------------------------------------------------------------------------------------------------------------------------------------------------------------------------------------------------------------------------------------------------------------------------------------------------------------------------------------------------------|---------------------------------------------------------------------------------------------------------------------------------------------------------------------------------------------------------------------------------------|-----------------------------------------------------------------------------------------------------------------------------------------------------------------------------------------------------------------------------------------------------------------------------------------------------------------------------------------------------------------------------------------------------------------------------------------------------------------------------------------------------------------------------------------------------------------------------------------------------------------------------------------------------------------------------------------------------------------------------------------------------------------------------------------------------------------------------------------------------------------------------------------------------------------------------------------------------------------------------------------------------------------------------------------------------------------------|
| <p> rassf1: Ras association (RalGDS/AF-6) domain family 1<br/> khdrbs: KH domain containing, RNA binding, signal transduction associated 1<br/> ptp4a3: protein tyrosine phosphatase, type 4a, member 3<br/> btg2: BTG family, member 2<br/> mapk14: mitogen-activated protein kinase 14 </p>                                                                                                                                                                                                                                                                                                                                                                                                                                                                                                                                                                                                                                                                                                                                                                                                                                                                                   | <p> +2.5<br/> -1.4<br/> +1.3<br/> +1.5<br/> +1.8 </p>                                                                                                                                                                                 | <p> tumor suppressor, inhibit mdm2, and cyclin D1 expressed in growth-arrested cells only, inhibits S phase<br/> stimulates progression from G1 to S phase at mitosis<br/> G1/S transition, anti-proliferative<br/> activated by stress, substrate p53, role in cell cycle/apopt </p>                                                                                                                                                                                                                                                                                                                                                                                                                                                                                                                                                                                                                                                                                                                                                                                 |
| <p><b>APOPTOSIS</b></p>                                                                                                                                                                                                                                                                                                                                                                                                                                                                                                                                                                                                                                                                                                                                                                                                                                                                                                                                                                                                                                                                                                                                                         |                                                                                                                                                                                                                                       |                                                                                                                                                                                                                                                                                                                                                                                                                                                                                                                                                                                                                                                                                                                                                                                                                                                                                                                                                                                                                                                                       |
| <p> gadd45a: growth arrest and DNA-damage-inducible alpha<br/> gadd45b: growth arrest and DNA-damage-inducible, beta<br/> thyn1: thymocyte nuclear protein 1<br/> bax: bcl2-associated X protein /// similar to Bax<br/> tmem49: transmembrane protein 49<br/> dapk3: death-associated protein kinase 3<br/> tsc22d3: TSC22 domain family, member 3<br/> optn: optineurin<br/> diablo: diablo homolog (Drosophila)<br/> hint1: histidine triad nucleotide binding protein 1<br/> casp3a: caspase 3, apoptosis-related cysteine protease a<br/> caspb: caspase b<br/> aplp: amyloid beta (A4) precursor-like protein<br/> appb: amyloid beta (A4) precursor protein b<br/> tia1: cytotoxic granule-associated RNA binding protein 1<br/> pdcfd6ip: programmed cell death 6 interacting protein<br/> ndrg11: N-myc downstream regulated gene 1, like<br/> aifm2: apoptosis-inducing factor, mitochondrion-associated, 2<br/> ankhd1: ankyrin repeat and KH domain containing 1<br/> birc2: baculoviral IAP repeat-containing 2<br/> aatf: apoptosis antagonizing transcription factor<br/> asns: asparagine synthetase<br/> cks2: CDC28 protein kinase regulatory subunit 2 </p>  | <p> +3<br/> +2.4<br/> +2.2<br/> +1.6<br/> +1.6<br/> +1.5<br/> +1.9<br/> +1.8<br/> +1.8<br/> +1.3<br/> -1.6<br/> -1.7<br/> -1.7<br/> -1.7<br/> -1.7<br/> -1.5<br/> -5.6<br/> +1.4<br/> +1.3<br/> +1.5<br/> +2.7<br/> +1.8<br/> +2 </p> | <p> pro-apoptotic<br/> pro-apoptotic<br/> induction of apoptosis<br/> pro-apoptotic<br/> stress induced, vacuolization and cell death<br/> positive regulator of apoptosis<br/> suppress apoptosis by inhibiting FOXO3a<br/> part of the TNF<math>\alpha</math> pathway, induces cell death<br/> promotes apoptosis<br/> pro-apoptotic<br/> effector caspase pro-apoptotic<br/> pro-apoptotic, inflammatory response<br/> enhancer of neuronal apoptosis<br/> enhancer of neuronal apoptosis<br/> binds poly(A) homopolymers, DNA fragmentation<br/> hydrolase, p53-mediated caspase activation/apoptosis oxidoreductase, which may play a role in mediating a p53-dependent apoptosis<br/> antiapoptotic, regulation of caspases<br/> apoptotic suppressor<br/> anti-apoptotic<br/> anti-apoptotic<br/> essential for cyclin dependent kinases function </p>                                                                                                                                                                                                         |
| <p><b>TRANSCRIPTION</b></p>                                                                                                                                                                                                                                                                                                                                                                                                                                                                                                                                                                                                                                                                                                                                                                                                                                                                                                                                                                                                                                                                                                                                                     |                                                                                                                                                                                                                                       |                                                                                                                                                                                                                                                                                                                                                                                                                                                                                                                                                                                                                                                                                                                                                                                                                                                                                                                                                                                                                                                                       |
| <p> atf7ip: activating transcription factor 7 interacting protein<br/> nfia: nuclear factor I/A<br/> camta1: calmodulin binding transcription activator 1<br/> nr2f2: nuclear receptor subfamily 2, group F, member 2<br/> top2b: topoisomerase (DNA) II beta 180kDa<br/> g3bp2: GTPase activating protein (SH3 domain) binding protein 2<br/> thrap6: thyroid hormone receptor associated protein<br/> med30: mediator complex subunit 30<br/> rybpa: RING1 and YY1 binding protein a<br/> tfap2b: transcription factor AP-2 beta<br/> tfap2a: transcription factor AP-2 alpha (activating enhancer binding protein 2 alpha)<br/> hmgn3: high mobility group nucleosomal binding domain 3<br/> prmt6: protein arginine methyltransferase 6<br/> insm1b: insulinoma-associated 1b<br/> nsd1a: Nuclear receptor binding SET domain protein 1a<br/> nat10: N-acetyltransferase 10<br/> rpap3: RNA polymerase II associated protein 3<br/> rfc5: replication factor C (activator 1) 5, 36.5kDa<br/> mych: myelocytomatosis oncogene homolog<br/> mycb: myelocytomatosis oncogene b<br/> mycn: myelocytomatosis oncogene, homolog<br/> minal: MYC induced nuclear antigen-like </p> | <p> -1.9<br/> -4.8<br/> -2.6<br/> -1.4<br/> -1.8<br/> -2.9<br/> -2.1<br/> -2.1<br/> -1.8<br/> -2.7<br/> -1.4<br/> -1.7<br/> +2.2<br/> +1.7<br/> +2<br/> +2<br/> +2<br/> +1.5<br/> +2.2<br/> +1.9<br/> +1.7<br/> +2.3 </p>             | <p> recruit TF to general transcription apparatus<br/> activates transcription and replication<br/> transcription activator, tumor suppressor<br/> initiation of transcription.<br/> control of topological DNA states by transient breakage<br/> may be involved in mRNA transport<br/> TRAP/Mediator complex, pol II transcription component of the Mediator complex, coactivator<br/> repressor of the transcriptional activity of E4TF1<br/> transcription regulator<br/> transcription regulator<br/> enhances transcription in the presence of thyroid hormone<br/> modifies histones, inhibits transcription<br/> transcriptional repression, CNS, pancreas<br/> bifunctional transcriptional regulator, methyltransferase<br/> histone acetyltransferase hTERT activation<br/> interface between RNA pol II and scaffolding proteins<br/> elongation of DNA by DNA pol. delta and epsilon<br/> transcription regulator, immediate early gene<br/> transcription regulator<br/> transcription regulator<br/> increases after c-myc after serum activation </p> |

|                                                                                  |      |                                                                                                           |
|----------------------------------------------------------------------------------|------|-----------------------------------------------------------------------------------------------------------|
| mybbp1a: myb-binding protein 1a                                                  | +2.5 | c-myb supressor                                                                                           |
| fos: v-fos FBJ murine osteosarcoma                                               | +8   | transcription regulator, immediate early gene                                                             |
| fosl2: FOS-like antigen 2                                                        | +6.4 | transcription regulator                                                                                   |
| junbl: jun B, like                                                               | +4.6 | transcription regulator                                                                                   |
| junb: jun B                                                                      | +3.6 | transcription regulator                                                                                   |
| jun: v-jun sarcoma virus 17                                                      | +1.5 | transcription regulator                                                                                   |
| atf1: activating transcription factor 1                                          | +1.4 | transcription regulator                                                                                   |
| atf3: activating transcription factor 3                                          | +7.3 | transcription regulator                                                                                   |
| atf4: activating transcription factor 4 (tax-responsive enhancer element B67)    | +3.1 | transcriptional activator, binds cAMP response element                                                    |
| polr2e:polymerase (RNA) II (DNA directed) polypept. E                            | +1.5 | component of polymerase                                                                                   |
| atf5: activating transcription factor 5                                          | +3.3 | transcription regulator                                                                                   |
| cnbp:CCHC-type zinc finger, nucl acid binding protein                            | +2.1 | sterol-mediated repression                                                                                |
| cebpb: CCAAT/enhancer binding protein (C/EBP), beta                              | +3.1 | transcription regulator                                                                                   |
| cebpg: CCAAT/enhancer binding prot (C/EBP), gamma                                | +3.1 | transcription regulator                                                                                   |
| cebpz: CCAAT/enhancer binding protein zeta                                       | +2   | transcription regulator                                                                                   |
| cebpa: CCAAT/enhancer binding protein (C/EBP), alpha                             | +1.5 | transcription regulator                                                                                   |
| htatsf1: HIV TAT specific factor 1                                               | +1.6 | transcription elongation                                                                                  |
| litaf: lipopolysaccharide-induced TNF factor                                     | +1.6 | transcription polII Charcot/Marie/Tooth disease                                                           |
| h1fx: H1 histone family, member X                                                | +2.3 | histone                                                                                                   |
| h1fo: H1 histone family, member 0                                                | +1.4 | histone                                                                                                   |
| h2afy2: H2A histone family, member Y2                                            | -1.6 | histone                                                                                                   |
| h2afx: H2A histone family, member X                                              | +1.4 | histone                                                                                                   |
| yy1b: YY1 transcription factor b                                                 | +1.7 | may act as activator or a repressor                                                                       |
| tceb3: transcription elongation factor B (SIII), polypeptide 3 (elongin A)       | +1.6 | transcription elongation                                                                                  |
| tbp: TATA box binding protein                                                    | +1.5 | the core of the DNA-binding multiprotein factor TFIID                                                     |
| zmf593: zinc finger protein 593                                                  | +2.4 | negatively modulates DNA binding activity of Oct-2                                                        |
| zfp36: zinc finger protein 36, C3H type, homolog (mse)                           | +1.8 | transcription regulator, response to growth factors                                                       |
| taf5: TAF5 RNA polymerase II, TATA box binding prtn                              | +1.3 | (TBP)-associated factor                                                                                   |
| taf8: TAF8 RNA polymerase II, TATA box binding prtn                              | +1.4 | (TBP)-associated factor                                                                                   |
| poldip2: polymerase (DNA-directed), delta interacting protein 2                  | +1.4 | transcription regulator                                                                                   |
| sirtuin: (silent mating type information regulation 2 homolog) 1 (S. cerevisiae) | +1.6 | deacetylates p53, TAF1b, represses transcription                                                          |
| sin3b: SIN3 homolog B, transcription regulator (yeast)                           | -1.3 | transcriptional repressor, antagonize MYC                                                                 |
| rbbp7: retinoblastoma binding protein 7                                          | +1.5 | histone-binding subunit, chromatin assembly, transcript                                                   |
| ets2:v-ets erythroblastosis virus E26 oncogene homolog2                          | +2.7 | transcription regulator                                                                                   |
| gpn1: GPN-loop GTPase 1                                                          | +1.7 | links pol II and chaperone/scaffolding proteins                                                           |
| aebp1: AE (adipocyte enhancer) binding protein 1                                 | -2.4 | transcriptional repressor, promotes proliferation                                                         |
| med28: mediator complex subunit 28                                               | +1.4 | component of the Mediator complex                                                                         |
| epc2: enhancer of polycomb homolog 2 (Drosophila)                                | +1.5 | part of NuA4 histone acetyltransferase (HAT) complex                                                      |
| ing3: inhibitor of growth family, member 3                                       | +1.3 | component of the NuA4 histone acetyltransferase                                                           |
| hif1an: hypoxia-inducible factor 1, alpha subunit inhibitor                      | +1.9 | regulator of the adaptive response to hypoxia                                                             |
| esrrg: estrogen-related receptor gamma                                           | -1.9 | orphan rec, transcription activator in ligand' absence                                                    |
| fubp1: far upstream element (FUSE) binding protein 1                             | -1.4 | stimulates expression of c-myc in undifferentiated cells                                                  |
| jarid1b: jumonji, AT rich interactive domain 1B                                  | -1.8 | histone demethylase, demethylates 'Lys-4' of histone H3                                                   |
| whsc2: Wolf-Hirschhorn syndrome candidate 2                                      | +1.9 | component of NELF complex, that negatively regulates the elongation of transcription by RNA polymerase II |
| pabpc4: poly(A) binding protein, cytoplasmic 4 (inducible form)                  | -1.7 | bind to the poly(A), increased in activated T cells and platelets                                         |
| pabpc3: poly(A) binding protein, cytoplasmic 3                                   | +1.3 | bind to the poly(A)                                                                                       |
| ndpkz2: nucleoside diphosphate kinase-Z2                                         | -1.6 | transcriptional activator of the c-Myc gene                                                               |
| <b>PROLIFERATION/DIFFERENTIATION/SIGNALING</b>                                   |      |                                                                                                           |
| ptena: phosphatase and tensin homolog A                                          | -1.5 | inositol phosphatase opposing PI3 kinase                                                                  |
| ptenb: phosphatase and tensin homolog B                                          | -1.5 | inositol phosphatase opposing PI3 kinase                                                                  |
| rbbp9: retinoblastoma binding protein 9                                          | +2.1 | confers resistance to growth-inhibitory effect of TGFb                                                    |



|                                                                                                |      |                                                                                                                         |
|------------------------------------------------------------------------------------------------|------|-------------------------------------------------------------------------------------------------------------------------|
| igf2: insulin-like growth factor 2 (somatomedin A)                                             | +1.6 | growth factor                                                                                                           |
| hbegf: heparin-binding EGF-like growth factor                                                  | +3.5 | growth factor                                                                                                           |
| igfbp1: insulin-like growth factor binding protein 1                                           | +3.9 | inhibition of proliferation                                                                                             |
| igf2bp1: insulin-like growth factor 2 mRNA binding pr 1                                        | +1.4 | inhibition of proliferation                                                                                             |
| rogbi: rogd homolog (Drosophila)                                                               | -1.5 | may act as a positive regulator of cell proliferation                                                                   |
| grb2: growth factor receptor-bound protein                                                     | -2.2 | suppressing proliferative signals                                                                                       |
| pdgfab: platelet derived growth factor alpha b                                                 | +2   | growth factor                                                                                                           |
| pdgfra: platelet derived growth factor receptor alpha                                          | -1.5 | growth factor receptor                                                                                                  |
| pdgfrl: platelet-derived growth factor receptor-like                                           | -2.9 | tumor suppressor, inhibits proliferation                                                                                |
| agr2/LOC799364:anterior gradient homolog 2 (Xenopus)                                           | -2.1 | differentiation                                                                                                         |
| bhlhb5: basic helix-loop-helix domain contain, class B, 5                                      | -1.7 | inhibit DNA binding to TCF3/E47                                                                                         |
| rasgef1bb: RasGEF domain family, member 1Bb                                                    | +2.3 | guanine nucleotide exchange factor for Ras                                                                              |
| arl4c: ADP-ribosylation factor-like 4C                                                         | +1.5 | binds/exchanges GTP and GDP, induced by cholesterol                                                                     |
| arl5b: ADP-ribosylation factor-like 5B                                                         | +1.3 | binds/exchanges GTP and GDP                                                                                             |
| arl8a: ADP-ribosylation factor-like 8A                                                         | -1.4 | binds/exchanges GTP and GDP                                                                                             |
| rasd1: RAS, dexamethasone-induced 1                                                            | +2.9 | morphology, growth, extracellular matrix interactions                                                                   |
| hig1: hypoxia induced gene 1                                                                   | +2.7 | over expressed in cancer                                                                                                |
| csrp1: cysteine and glycine-rich protein 1                                                     | +1.8 | suppresses proliferation, stress response/ development                                                                  |
| drg1: developmentally regulated GTP binding protein 1                                          | +1.8 | suppress proliferation                                                                                                  |
| pdap1: pdgfa associated protein 1                                                              | +1.7 | regulate pdgfa                                                                                                          |
| dusp1: dual specificity phosphatase 1                                                          | +1.7 | dephosphorylates ERK2, suppress growth                                                                                  |
| ptpn12:protein tyrosine phosphatase,non-receptor type 12                                       | +1.7 | ABL-kinase regulation, cytoskeleton                                                                                     |
| ywhag1: 3-monooxygenase/tryptophan 5-monooxygenase activation protein, gamma polypeptide 1     | +1.7 | 14-3-3 family, adapter protein signal transduction                                                                      |
| fkbp5: FK506 binding protein 5                                                                 | +2   | progesterone receptor-associated, calcineurin inhibition                                                                |
| map3k7ip1: mitogen-activated protein kinase kinase 7 interacting protein 1                     | +2   | intermediate between TGFb and MAP3K7/TAK1, embryogenesis                                                                |
| dnajc11:DnaJ(Hsp40) homolog, subfamily C, member 11                                            | +1.9 | deleted in neuroblastoma,, tumor supressor                                                                              |
| lyricl: lyric-like = astrocyte elevated gene-1                                                 | +1.5 | promote metastasis by activating NF-kB                                                                                  |
| ywhah: tyrosine 3-monooxygenase/tryptophan 5-monooxygenase activation protein, eta polypeptide | -1.7 | conserved 14-3-3 family phosphoserine or phosphothreonine motif recognition                                             |
| id1: inhibitor of DNA binding 1,                                                               | +1.5 | negatively regulates cell differentiation                                                                               |
| id2: inhibitor of DNA binding 2, dominant negative helix-loop-helix protein, a                 | -1.7 | dominant negative helix-loop-helix protein                                                                              |
| id4: inhibitor of DNA binding 4                                                                | -2.3 | dominant negative helix-loop-helix protein                                                                              |
| chn1: chimerin (chimaerin) 1                                                                   | -1.7 | GTPase-activating protein for p21-rac and a phorbol ester receptor, axon pathfinding                                    |
| ldb3: LIM-domain binding factor 3, like                                                        | -1.7 | couple PKC-mediated signal via its LIM domains to the cytoskeleton                                                      |
| stam: signal transducing adaptor molecule (SH3 domain and ITAM motif) 1                        | -1.6 | cytokine and growth factors signaling                                                                                   |
| egfl6: EGF-like-domain, multiple 6                                                             | -1.6 | member of the EGF repeat superfamily                                                                                    |
| fzd2: frizzled homolog 2                                                                       | -1.6 | receptor for Wnt proteins, fetal kidney                                                                                 |
| fzd7: frizzled homolog 7 (Drosophila)                                                          | +1.3 | receptor for Wnt proteins                                                                                               |
| wif1: WNT inhibitory factor 1                                                                  | +2.6 | inhibition of wnt pathway                                                                                               |
| ctnnbip1: catenin, beta interacting protein 1                                                  | -1.7 | inhibition of wnt pathway                                                                                               |
| map2k6: mitogen-activated protein kinase kinase 6                                              | +1.4 | inflammatory cytokines,environmental stress, p38 pathw                                                                  |
| map2k4:mitogen-activated protein kinase kinase kinase 4                                        | +1.3 | activates JUN kinases T cell development, organogenesis                                                                 |
| map3k7ip1: mitogen-activated protein kinase kinase 7 interacting protein 1                     | +2   | mediate various signaling pathways, embryogenesis                                                                       |
| mapkapk2: mitogen-activated protein kinase-activated protein kinase 2                          | +1.5 | regulated through phosph. by p38 MAP kinase, stress, inflammation, nuclear export, expression, proliferation. signaling |
| stat3: signal transducer and activator of transcription 3 (acute-phase response factor)        | +1.9 |                                                                                                                         |
| arhgdib: Rho GDP dissociation inhibitor (GDI) beta                                             | -1.4 | GDP/GTP exchange reaction of Rho proteins, endosome, cytoskeleton, cell-matrix, suppress metastases.                    |
| arhgef4:Rho guanine nucleotide exchange factor 4                                               | -1.6 | exchange factor for RhoA and RAC1 cell adhesion                                                                         |
| ppp2r2c: protein phosphatase 2 (formerly 2A), regulatory subunit B, gamma isoform              | -2.4 | negative control of cell growth and division                                                                            |

|                                                                                                    |      |                                                                                                                    |
|----------------------------------------------------------------------------------------------------|------|--------------------------------------------------------------------------------------------------------------------|
| ywhae: tyrosine 3-monooxygenase/tryptophan 5-monooxygenase activation protein, epsilon polypeptide | +1.4 | adapter protein binds phosphoserine or phosphothreonin cell-cycle checkpoints,signal transd,inhibitor of apoptosis |
| tnip1: TNFAIP3 interacting protein 1                                                               | -1.4 | inhibits TNF-induced NFkB-dependent gene expression                                                                |
| tifa: TRAF-interacting protein with forkhead-associated domain                                     | +2.3 | mediates IRAK1/TRAF6 interaction resulting in activation of NF-kappa-B and AP-1 pathways                           |
| rasgef: RasGEF domain family, member 1B                                                            | +1.3 | GEF for KRAS, HRAS, NRAS role in cell migration                                                                    |
| cry2: cryptochrome 2 (photolyase-like)                                                             | +1.9 | blue light-dependent regulator of circadian feedback loop                                                          |
| reps1: RALBP1 associated Eps domain containing 1                                                   | +1.9 | coordinate the cellular actions of activated EGF receptors and Ral-GTPases                                         |
| ranbp1: RAN binding protein 1                                                                      | +1.4 | Inhibits GTP exchange on Ran.                                                                                      |
| pelp1: proline, glutamate and leucine rich protein 1                                               | +1.4 | coactivator of estrogen receptor                                                                                   |
| pdcl3: phosducin-like 3                                                                            | +1.6 | modulate heterotrimeric G proteins,apoptosis, cytoskeleton                                                         |
| mtdh: metadherin                                                                                   | +1.6 | promotes survival through PI3K-Akt signaling                                                                       |
| ms4a4a: membrane-spanning 4-domains, subfamily A, member 4                                         | +1.8 |                                                                                                                    |
| hdgf2: hepatoma-derived growth factor-related protein 2                                            | +1.5 | member hepatoma-derived growth factor (HDGF) family                                                                |
| gps1: G protein pathway suppressor 1                                                               | +1.5 | component of the COP9 signalosome complex                                                                          |
| fgfbp1: fibroblast growth factor binding protein 1                                                 | +1.8 | carry FGFs from extracellular matrix (EM) storage                                                                  |
| ebf2: early B-cell factor 2                                                                        | +1.3 | Olf/EBF family transcription factors, differentiation                                                              |
| cops3: COP9 constitutive photomorphogenic homolog subunit 3 (Arabidopsis)                          | +1.3 | COP9 signalosome complex                                                                                           |
| cd81: CD81 molecule                                                                                | +1.5 | regulation of lymphoma cell growth                                                                                 |
| cav1: caveolin 1, caveolae protein, 22kDa                                                          | +1.5 | links integrin subunits to the tyrosine kinase FYN                                                                 |
| angptl4: angiopoietin-like 4                                                                       | +1.5 | hypoxia-induced. glucose metabolism, inhibit proliferation                                                         |
| akap1: A kinase (PRKA) anchor protein 1                                                            | +1.4 | binds PKA confining it to discrete locations                                                                       |
| adcyap1: adenylate cyclase activating polypeptide 1 (pituitary)                                    | -1.4 | stimulates adenylate cyclase increasing camp levels                                                                |
| limk2: LIM domain kinase 2                                                                         | +1.4 | phosphorylation of myelin basic protein and histone                                                                |
| epha2: EPH receptor A2                                                                             | +1.9 | receptor for ephrin-A1, -A3, -A4 and -A5                                                                           |
| csnk2a1: casein kinase 2, alpha 1 polypeptide                                                      | +1.4 | participates in Wnt signaling.                                                                                     |
| chuk: conserved helix-loop-helix ubiquitous kinase                                                 | +1.5 | phosphorylates inhibitors of NF-kappa-B                                                                            |
| gpr85: G protein-coupled receptor 85                                                               | -2.8 | orphan receptor                                                                                                    |
| vcp: valosin-containing protein                                                                    | -1.5 | mitosis, membrane fusion, spindle pole body function, and ubiquitin-dependent protein degradation                  |
| snd1: staphylococcal nuclease and tudor domain containing 1                                        | -1.3 | bridging factor between STAT6 and the basal transcription factor                                                   |
| sdcbp: syndecan binding protein (syntenin)                                                         | -1.3 | syndecan-mediated signaling to the cytoskeleton                                                                    |
| gtpbp1: GTP binding protein 1                                                                      | +3.0 | microtubule-based movement immune response                                                                         |
| gng7: guanine nucleotide binding protein (G protein), gamma 7                                      | -1.7 | modulator or transducer in various transmembrane signaling systems, gamma subunit confers specificity              |
| gng3: guanine nucleotide binding protein (G protein), gamma 3                                      | -2   |                                                                                                                    |
| gng13: guanine nucleotide binding protein (G protein), gamma 13                                    | -6.3 |                                                                                                                    |
| gnao1: guanine nucleotide binding protein (G protein), alpha activating activity polypeptide O     | -1.4 | interacts with progesterone receptor, folding, trafficking modulation of ryanodine receptor isoform-1              |
| fkbp5: FK506 binding protein 5                                                                     | +2   | cis-trans prolyl isomerase modul. ryanodine receptor                                                               |
| fkbp1a: FK506 binding protein 1A, 12kDa                                                            | -1.3 | hydroxylates HIF-1 alpha at 'Pro-564', and HIF-2 alpha.                                                            |
| fkbp1b: FK506 binding protein 1B, 12.6 kDa                                                         | -1.5 | Functions as a cellular oxygen sensor                                                                              |
| egl3: egl nine homolog 3 (C. elegans)                                                              | +4.5 | ubiquitination of tyrosine-phosphorylated CDH1                                                                     |
| cbll1: Cas-Br-M (murine) ecotropic retroviral transforming sequence-like 1                         | +1.6 | control of angiogenesis, inflammation, and wound healing                                                           |

## Supplementary table 2

### Changes in expression of genes functioning in metabolism, transport, chaperones, organelles

| genes                                                                   | fold  | function                                                |
|-------------------------------------------------------------------------|-------|---------------------------------------------------------|
| <b>CHAPERONES</b>                                                       |       |                                                         |
| hsp47: heat shock protein 47                                            | +4.5  | chaperone protein for collagen                          |
| hspa9: heat shock protein 9                                             | +2.6  | centrosome duplication, cell proliferation, chaperone   |
| hspa14: heat shock protein 14                                           | +2.4  | complex LAP2 - chromosomes                              |
| hsp90a.1: heat shock protein 90-alpha 1                                 | +2.3  | molecular chaperone, folding, degradation               |
| dnajc11: DnaJ (Hsp40) homolog, subfamily C, member 11                   | +1.9  | chaperone                                               |
| dnajc21: DnaJ (Hsp40) homolog, subfamily C, member 21                   | +1.7  | chaperone                                               |
| hspb8: Heat shock protein, alpha-crystallin-related, b8                 | +1.7  | chaperone                                               |
| hspb1: heat shock protein, alpha-crystallin-related, 1                  | +1.5  | chaperone                                               |
| hspd1: heat shock 60kD protein 1 (chaperonin)                           | +1.4  | chaperone                                               |
| hspa4: heat shock protein 4                                             | +1.3  | chaperone                                               |
| pfdn5: prefoldin 5                                                      | +1.7  | a subunit of chaperone prefoldin                        |
| pfdn4: prefoldin subunit 4                                              | +1.9  | a subunit of chaperone prefoldin                        |
| dnajc21: DnaJ (Hsp40) homolog, subfamily C, member 21                   | +1.7  | may act as co-chaperone for HSP70                       |
| unc45b: unc-45 homolog B (C. elegans)                                   | +1.6  | may act as HSP90 co-chaperone, myosin folding           |
| xbp1: X-box binding protein 1 /// hypothetical protein LOC793034        | +1.7  | folding, transporting, glycosylation, degradation       |
| calr: calreticulin                                                      | -4.1  | ER, prevents export misfolded proteins                  |
| hsp90b1: heat shock protein 90kDa beta (grp94), member 1                | -4.3  | ER, processing, transport secreted proteins, in complex |
| pdia4: protein disulfide isomerase associated 4                         | -1.9  | part of ER chaperone complex together with hsp90b1      |
| pda6: protein disulfide isomerase family A, member 6                    | -1.7  | part of the same complex                                |
| ppib: peptidylprolyl isomerase B (cyclophilin B)                        | -1.5  | part of the same complex                                |
| hspa5: heat shock 70kDa protein 5 (glucose-regulated protein)           | -1.8  | part of the same complex                                |
| derl3: derlin 3 homolog, BQ260790                                       | -11   | degradation of misfolded glycoproteins in the ER        |
| derl2: Der1-like domain family, member 2                                | -10.6 | degradation of misfolded proteins in the ER             |
| gdi1: GDP dissociation inhibitor 1                                      | -2.1  | GDP-GTP exchange reaction of rab proteins               |
| sgta: small glutamine-rich tetratricopeptide repeat (TPR)-containing    | +1.4  | co-chaperone that binds directly to HSC70 and HSP70     |
| cct7: chaperonin containing TCP1, subunit 7 (eta)                       | +1.5  | assist the folding of proteins upon ATP hydrolysis      |
| cct5: chaperonin containing TCP1, subunit 5 (epsilon)                   | +1.5  | assist the folding of proteins upon ATP hydrolysis      |
| cct2: chaperonin containing TCP1, subunit 2 (beta)                      | +1.3  | assist the folding of proteins upon ATP hydrolysis      |
| xbp1: X-box binding protein 1                                           | +1.7  | activates unfolded protein response                     |
| pscd1: pleckstrin homology, Sec7 and coiled-coil domains 1(cytohesin 1) | +1.5  | GDP with GTP exchange, protein sorting                  |
| <b>DETOXICATION</b>                                                     |       |                                                         |
| sod2: superoxide dismutase 2, mitochondrial                             | -1.4  | turn superoxide radicals into hydrogen peroxide         |
| sod1: superoxide dismutase 1, soluble, amyotrophic lateral sclerosis 1  | -1.4  | turn superoxide radicals into hydrogen peroxide         |
| cat: catalase                                                           | -1.9  | destroys hydrogen peroxide                              |
| prdx2: peroxiredoxin 2                                                  | -1.3  | reduces hydrogen peroxide and alkyl hydroperoxides      |
| prdx1: peroxiredoxin 1                                                  | +1.8  |                                                         |
| prdx5: peroxiredoxin 5                                                  | -1.3  |                                                         |
| txndc9: thioredoxin domain containing 9                                 | -1.4  |                                                         |
| txnl4a: thioredoxin-like 4A                                             | -1.3  |                                                         |
| txnr3: thioredoxin reductase 3                                          | +1.3  |                                                         |
| txn: thioredoxin                                                        | +1.8  | reduction of overoxidized peroxiredoxins                |
| txnr1: thioredoxin reductase 1                                          | +1.3  | reduces thioredoxins                                    |
| txnip: thioredoxin interacting protein                                  | +1.9  | inhibits thioredoxin activity                           |
| glrx3: glutaredoxin 3                                                   | +1.7  | reduction of protein thiols, antioxidant                |
| gstp1: glutathione S-transferase pi                                     | +1.7  | conjugation of reduced glutathione                      |
| gsr: glutathione reductase                                              | +1.9  |                                                         |
| gstm3: glutathione S-transferase M3 (brain)                             | +1.3  |                                                         |
| sesn3: sestrin 3                                                        | +1.9  | antioxidant modulators of peroxiredoxins                |
| aldh2b: aldehyde dehydrogenase 2b                                       | -2.1  | oxidases aldehydes, acetaldehyde oxidation              |
| adh8b: aldehyde dehydrogenase 8b                                        | -1.8  | oxidases aldehydes                                      |
| aldh1b1: aldehyde dehydrogenase 1 family, member B1                     | -2.1  | oxidases aldehydes acetaldehyde oxidation               |

|                                                                                     |      |                                                                    |
|-------------------------------------------------------------------------------------|------|--------------------------------------------------------------------|
| aldh7a1: aldehyde dehydrogenase 7 family, member A1                                 | -1.6 | oxidases aldehydes, lysine catabolism,                             |
| aldh91a1: aldehyde dehydrogenase 9 family, member A1                                | -1.4 | oxidases aldehydes, GABA biosynthesis                              |
| <b>TRANSPORT</b>                                                                    |      |                                                                    |
| mvp, major vault protein                                                            | +2.3 | nucleo-cytoplasmic transport                                       |
| nup43: nucleoporin 43                                                               | +2.2 | nucleo-cytoplasmic transport                                       |
| nup50: nucleoporin 50                                                               | +1.7 | nucleo-cytoplasmic transport                                       |
| nup11: nucleoporin like 1                                                           | +1.8 | nucleo-cytoplasmic transport                                       |
| nup62: nucleoporin 62                                                               | +1.8 | nucleo-cytoplasmic transport                                       |
| nup35: nucleoporin 35                                                               | +1.8 | nucleo-cytoplasmic transport                                       |
| nup88: nucleoporin 88                                                               | +1.5 | nucleo-cytoplasmic transport                                       |
| nip7: nuclear import 7 homolog (S. cerevisiae)                                      | +2   |                                                                    |
| slc16a9b:solute carrier family 16(monocarboxylic acid transporters)                 | +3   | proton-linked monocarboxylate transporter                          |
| sec22ba: SEC22 vesicle trafficking protein homolog Ba                               | +2.9 | ER-Golgi protein trafficking                                       |
| abcf1: ATP-binding cassette, sub-family F (GCN20), member 1                         | +2.8 | ATP transporter                                                    |
| abce1: ATP-binding cassette, sub-family E (OABP), member 1                          | +1.6 | ATP transporter                                                    |
| slc7a3: solute carrier family 7 (aa transporter, y+ system), member 3               | +1.9 | transport of cationic amino acids                                  |
| grp11: GrpE-like 1, mitochondrial                                                   | +1.9 | protein translocation inner membrane into the mit matrix           |
| slc1a3:solute carrier family1(glial high affinity glutamate transporter             | +1.7 | glutamate transporter                                              |
| slc1a4: solute carrier family 1 (glutamate/neutral aa transporter) 4                | +1.5 | glutamate transporter                                              |
| slc3a2: solute carrier family 3, member 2                                           | +1.3 | activators of dibasic and neutral amino acid transport             |
| slc20a1b: solute carrier family 20, member 1b                                       | +1.4 | transporter                                                        |
| slc11a2: solute carrier family 11, member 2                                         | +1.5 | proton-coupled divalent metal ion transporters                     |
| snx5: sorting nexin 5                                                               | +1.6 | may be a retromer unit, endosomes to Golgi mannose-6P              |
| snx7: sorting nexin 7                                                               | +1.5 | transporter                                                        |
| mal: T-cell differentiation protein                                                 | +1.7 | transporter                                                        |
| ntd5: ntl-dependent gene 5= apolipoprotein H                                        | +1.6 | lipoprotein metabolism, coagulation                                |
| ldlr2:low density lipoprotein receptor class A domain containing 2                  | +2.5 | lipoprotein receptor                                               |
| apoh: apolipoprotein H (beta-2-glycoprotein I)                                      | +1.6 | transporter extracellular space                                    |
| apod: apolipoprotein D                                                              | +1.5 | transporter extracellular space                                    |
| ipo9: importin 9                                                                    | +2.4 | transporter, nucleus                                               |
| ipo4: importin 4                                                                    | +1.7 | transporter, nucleus                                               |
| ipo5: importin 5                                                                    | +1.5 | transporter, nucleus                                               |
| ap1s1: adaptor-related protein complex 1, sigma 1 subunit                           | +1.4 | transporter                                                        |
| ap1s3: adaptor-related protein complex 1, sigma 3 subunit                           | +1.5 | transporter                                                        |
| abcb7: ATP-binding cassette, sub-family B (MDR/TAP), member 7                       | +1.3 | transporter                                                        |
| tspo: translocator protein (18kDa)                                                  | +1.6 | transmembrane protein                                              |
| gpc6: glypican 6                                                                    | +1.7 | transmembrane protein                                              |
| tnpo3: transportin 3                                                                | +2.2 | transporter                                                        |
| magt1: magnesium transporter 1                                                      | +1.7 | transporter                                                        |
| chac1: ChaC, cation transport regulator homolog 1 (E. coli)                         | +1.4 |                                                                    |
| golt1b: golgi transport 1 homolog B (S. cerevisiae)                                 | +1.3 |                                                                    |
| vamp3: vesicle-associated membrane protein 3 (cellubrevin)                          | +1.3 | targeting/fusion of transport vesicles to target membrane          |
| srp72: signal recognition particle 72kDa                                            | +1.5 | targets secretory proteins to rough ER membrane                    |
| rab21: RAB21, member RAS oncogene family                                            | +1.4 | integrin trafficking                                               |
| yif1a: Yip1 interacting factor homolog A (S. cerevisiae)                            | +1.5 | transport between endoplasmic reticulum and Golgi                  |
| yipf5: Yip1 domain family, member 5                                                 | +1.3 | transport between endoplasmic reticulum and Golgi                  |
| prickle: prickle homolog 1 (Drosophila)                                             | +1.5 | Nuclear translocation receptor                                     |
| atp2a11:ATPase, Ca <sup>++</sup> transporting, cardiac muscle, fast twitch 1like    | -2.6 | bring Ca <sup>+</sup> to sarcoplasmic reticulum muscle contraction |
| atp2a1: ATPase, Ca <sup>++</sup> transporting, cardiac muscle, fast twitch 1        | -1.7 | Ca <sup>++</sup> transporting                                      |
| atp1a1b: ATPase, Na <sup>+</sup> /K <sup>+</sup> transporting, alpha 1b polypeptide | -1.9 | Vesicular transport                                                |
| atp1a3a: ATPase, Na <sup>+</sup> /K <sup>+</sup> transporting, alpha 3a polypeptide | -2.2 | vesicle-mediated transport, fusion protein                         |
| atp1b2a: ATPase, Na <sup>+</sup> /K <sup>+</sup> transporting, beta 2a polypeptide  | -1.7 | vesicle-mediated transport, fusion protein                         |
| atp6v1e1: ATPase, H <sup>+</sup> transporting, lysosomal, V1 subunit E isof 1       | -1.9 | acidification of eukaryotic intracellular organelles               |
| atp6v1d: ATPase, H <sup>+</sup> transporting, V1 subunit D                          | -1.7 | acidification of eukaryotic intracellular organelles               |
| atp6v1h: ATPase, H <sup>+</sup> transporting, lysosomal, V1 subunit H               | -1.5 | acidification of eukaryotic intracellular organelles               |
| atp6v1g1: ATPase, H <sup>+</sup> transporting, V1 subunit G isoform 1               | -1.4 | acidification of eukaryotic intracellular organelles               |
| atp6v0d1: ATPase, H <sup>+</sup> transporting, V0 subunit D isoform 1               | -2.0 | transporter                                                        |
| atp6v1b2: ATPase, H <sup>+</sup> transporting, lysosomal, V1 sbunit B2              | -1.6 | transporter                                                        |

|                                                                                               |      |                                                                                                               |
|-----------------------------------------------------------------------------------------------|------|---------------------------------------------------------------------------------------------------------------|
| rab3c: RAB3C, member RAS oncogene family                                                      | -2.0 | vesicles transport                                                                                            |
| flot1: flotillin 1                                                                            | -1.7 | endocytosis                                                                                                   |
| nsf: N-ethylmaleimide-sensitive factor                                                        | -2.0 | fusion of transport vesicles within the Golgi cisternae                                                       |
| syt1: synaptotagmin I                                                                         | -2.1 | synaptic vesicles trafficking and exocytosis                                                                  |
| vldlr: very low density lipoprotein receptor                                                  | -1.9 | binds VLDL and transports it into cells by endocytosis                                                        |
| sybp /// zgc:136469: synaptophysin b                                                          | -1.9 | fusion of synaptic vesicles in brain/endocrine cells                                                          |
| apob: novel protein similar to vertebrate apolipoprotein B                                    | -1.8 | transport of fatty acids                                                                                      |
| apom: apolipoprotein M                                                                        | -1.6 | associated with high density lipoproteins                                                                     |
| apoc2: apolipoprotein C-II                                                                    | -1.6 | activates lipoprotein lipase hydrolyzing triglycerides                                                        |
| rtn1b: reticulon 1b                                                                           | -1.8 | neuroendocrine secretion, membrane trafficking                                                                |
| slc39a7: solute carrier family 39 (zinc transporter), member 7                                | -1.6 | Zn transport                                                                                                  |
| slc17a5: solute carrier family 17, member 5                                                   | -2.9 | anion/sugar transporter                                                                                       |
| slc40a1: solute carrier family 40, member 1                                                   | -1.5 | transporter                                                                                                   |
| slc7a6os: solute carrier family 7, member 6 opposite strand                                   | -1.4 |                                                                                                               |
| slc16a12: solute carrier family 16, member 12                                                 | -1.4 | monocarboxylic acid transporter 12                                                                            |
| tcn2: transcobalamin II; macrocytic anemia                                                    | -1.7 | iron-regulated transporter                                                                                    |
| syt4: synaptotagmin IV                                                                        | -1.6 | transporter, extracellular space                                                                              |
| ldb3: LIM-domain binding factor 3, like                                                       | -1.7 | transporter                                                                                                   |
| gja1: gap junction protein, alpha 1, 43kDa                                                    | -1.4 | transporter                                                                                                   |
| etfa: electron-transfer-flavoprotein, alpha polypeptide                                       | -1.4 | transporter                                                                                                   |
| arpp19: cAMP-regulated phosphoprotein 19                                                      | -1.3 | transporter                                                                                                   |
| apba2: amyloid beta (A4) precursor protein-binding, family A, member 2                        | -1.4 | transporter                                                                                                   |
| ap3m2: adaptor-related protein complex 3, mu 2 subunit                                        | -1.5 | transporter                                                                                                   |
| ap3s: adaptor-related protein complex 3, sigma 2 subunit                                      | -1.4 | transporter                                                                                                   |
| abcd3a: ATP-binding cassette, sub-family D (ALD), member 3a                                   | -1.4 | transporter                                                                                                   |
| abcc5: ATP-binding cassette, sub-family C (CFTR/MRP), member 5                                | -1.8 | transporter                                                                                                   |
| sepp1: selenoprotein P, plasma, 1                                                             | -2.3 | transporter                                                                                                   |
| nkain1: Na <sup>+</sup> /K <sup>+</sup> transporting ATPase interacting 1                     | -1.3 |                                                                                                               |
| vamp2: vesicle-associated membrane protein 2 (synaptobrevin 2)                                | -2.1 | targeting/fusion of transport vesicles to target membrane                                                     |
| rab1b: RAB1B, member RAS oncogene family                                                      | -1.3 | protein transport between the ER and Golgi                                                                    |
| rab5a: RAB5A, member RAS oncogene family                                                      | -1.3 | fusion of plasma membranes and early endosomes                                                                |
| rab7a: RAB7A, member RAS oncogene family                                                      | -1.5 | traffic in late endosomes and lysosomes                                                                       |
| rac3: ras-related C3 botulinum toxin substrate 3 (rho family, small GTP binding protein Rac3) | -1.6 | small GTPase, cell spreading, formation of actin-based protusions including lamellipodia and membrane ruffles |
| <b>CA<sup>++</sup>-BINDING PROTEINS</b>                                                       |      |                                                                                                               |
| calm1a/calm1b/calm2a /calm2b /calm3a /calm3b: calmodulin                                      | -1.6 | Ca ion binding                                                                                                |
| pvalb: parvalbumin                                                                            | -1.8 | Ca ion binding                                                                                                |
| pvalb3: parvalbumin 3                                                                         | -2.0 | Ca ion binding, muscle relaxation                                                                             |
| pvalb8: parvalbumin 8                                                                         | -1.8 | Ca ion binding                                                                                                |
| pvalb1: parvalbumin 1                                                                         | -1.6 | Ca ion binding                                                                                                |
| calb2: calbindin 2, (calretinin)                                                              | -2.0 | Ca ion binding, auditory neurons, cancer                                                                      |
| rcn3: reticulocalbin 3, EF-hand calcium binding domain                                        | -2.0 | Ca ion binding                                                                                                |
| calb2l: calbindin 2, like                                                                     | -1.9 | intracellular Ca-binding protein troponin C superfamily                                                       |
| atp2b3a: ATPase, Ca <sup>++</sup> transporting, plasma membrane 3a                            | -1.8 | Ca membrane transport                                                                                         |
| camk2d2: Calcium/calmodulin-dependent protein kinase                                          | -2.3 | signals to histone deacetylase 4, cardiac cells                                                               |
| anxa1a: annexin A1a                                                                           | +1.4 | calcium-dependent phospholipid binding proteins                                                               |
| anxa1c /// zgc:86853: annexin A1c                                                             | +1.6 | calcium-dependent phospholipid binding proteins                                                               |
| anxa4 /// LOC792474: similar to annexin A4                                                    | -2.2 | calcium-dependent phospholipid binding proteins                                                               |
| anxa2a: annexin A2a                                                                           | +2.1 | calcium-dependent phospholipid binding proteins                                                               |
| axa11: annexin A11                                                                            | -1.3 | calcium-dependent phospholipid binding proteins                                                               |
| axa2: annexin A2                                                                              | +2   | calcium-dependent phospholipid binding proteins                                                               |
| cherp: calcium homeostasis endoplasmic reticulum protein                                      | +1.4 |                                                                                                               |
| gca: grancalcin, EF-hand calcium binding protein                                              | -1.4 |                                                                                                               |
| hpcal: hippocalcin                                                                            | -1.4 |                                                                                                               |
| hrc: histidine rich calcium binding protein                                                   | -1.4 |                                                                                                               |
| ocm: oncomodulin                                                                              | +1.4 | high-affinity calcium ion-binding protein                                                                     |
| <b>HORMONES</b>                                                                               |      |                                                                                                               |

|                                                                                                                      |      |                                                                                                                                   |
|----------------------------------------------------------------------------------------------------------------------|------|-----------------------------------------------------------------------------------------------------------------------------------|
| ins: preproinsulin                                                                                                   | +1.8 | glucose uptake and conversion to glycogen                                                                                         |
| prl: prolactin                                                                                                       | +4   | anti-apoptotic                                                                                                                    |
| fst: follistatin                                                                                                     | +2.6 | opposes activin, BMP4, induces D1cyclin                                                                                           |
| sgk1: serum/glucocorticoid regulated kinase 1                                                                        | +1.9 | stimulates glycogenolysis and proteolysis                                                                                         |
| neurod: neurogenic differentiation                                                                                   | -3.9 | insulin production                                                                                                                |
| <b>ENERGY PRODUCTION</b>                                                                                             |      |                                                                                                                                   |
| pygl: phosphorylase, glycogen (Hers/glycogen storage dis type VI)                                                    | -1.8 | glycolysis, production of glucose from glycogen, liver                                                                            |
| pygmb: phosphorylase, glycogen (muscle) b                                                                            | -1.6 | glycolysis, production of glucose from glycogen, muscle                                                                           |
| gpib: glucose phosphate isomerase b                                                                                  | -1.9 | glycolysis, glucose/fructose phosphate isomerization                                                                              |
| pfkm: phosphofructokinase, muscle                                                                                    | -1.8 | glycolysis, makes fructose 1.6-bisphosphate                                                                                       |
| aldoab: aldolase a, fructose-bisphosphate, b                                                                         | -1.7 | form dihydroxyacetone and glyceraldehyde 3-phosphate                                                                              |
| tp1a: triosephosphate isomerase 1a                                                                                   | -3   | dihydroxyacetone phosphate into glyceraldehyde 3-phos                                                                             |
| pgam2: phosphoglycerate mutase 2 (muscle)                                                                            | -1.9 | glycolysis, convert 3- into 2-phosphoglycerate                                                                                    |
| pklr: pyruvate kinase, liver and RBC                                                                                 | -1.3 | glycolysis, forms pyruvate                                                                                                        |
| ldha: lactate dehydrogenase A4                                                                                       | -1.8 | convert lactate into pyruvate                                                                                                     |
| pkfb3: 6-phosphofructo-2-kinase/fructose-2,6-bisphosphatase 3                                                        | +2.6 | synthesis of biphosphate that supresses glycolysis                                                                                |
| pkfb4: 6-phosphofructo-2-kinase/fructose-2,6-bisphosphatase 4                                                        | +1.4 | synthesis of biphosphate that supresses glycolysis                                                                                |
| fbp1: fructose-1,6-bisphosphatase 1                                                                                  | -1.4 | hydrolysis of 1,6-bisphosphate                                                                                                    |
| g6pc: glucose-6-phosphatase, catalytic subunit                                                                       | +2.4 | catalyses glucose-6-phosphate hydrolysis                                                                                          |
| aldoa1: aldolase A-like 1                                                                                            | -1.7 |                                                                                                                                   |
| idh1: isocitrate dehydrogenase 1 (NADP+), soluble                                                                    | -1.3 |                                                                                                                                   |
| sogdh: oxoglutarate (alpha-ketoglutarate) dehydrogenase (lipoamide)                                                  | -1.6 | citric acid cycle                                                                                                                 |
| mdh1a: malate dehydrogenase 1a, NAD (soluble)                                                                        | -1.5 | citric acid cycle                                                                                                                 |
| ogdh: oxoglutarate (alpha-ketoglutarate) dehydrogenase (lipoamide)                                                   | -1.6 | citric acid cycle                                                                                                                 |
| got2b: glutamic-oxaloacetic transaminase 2b                                                                          | -1.5 | citric acid cycle                                                                                                                 |
| got1: glutamic-oxaloacetic transaminase 1, soluble (aspartate aminotransferase 1)                                    | -1.4 | citric acid cycle                                                                                                                 |
| lctla: lactase-like a                                                                                                | -6.4 |                                                                                                                                   |
| gpd1b: glycerol-3-phosphate dehydrogenase 1b                                                                         | -2.1 | lactose hydrolysis                                                                                                                |
| slc25a1: solute carrier family 25, member 1                                                                          | -1.6 |                                                                                                                                   |
| ucp2: uncoupling protein 2 (mitochondrial, proton carrier)                                                           | -1.5 | citrate transporter                                                                                                               |
| mdh2: malate dehydrogenase 2, NAD (mitochondrial)                                                                    | -1.4 | transporter                                                                                                                       |
| gatm: glycine amidinotransferase (L-arginine:glycine)                                                                | -1.7 | citric acid cycle, converts malate into oxaloacetate                                                                              |
| ckmb: creatine kinase, muscle b                                                                                      | -1.3 | creatine biosynthesis                                                                                                             |
| ckma: creatine kinase, muscle a                                                                                      | -1.3 | energy homeostasis. reversibly catalyze the transfer of phosphate between ATP and various phosphogens such as creatine phosphate. |
| ckb: creatine kinase, brain                                                                                          | -3.2 | subunit of ATP synthase                                                                                                           |
| atp5a1: glutaryl-Coenzyme A dehydrogenase, ATP synthase                                                              | -1.3 | subunit of ATP synthase                                                                                                           |
| atp5j: ATP synthase, H+ transporting, mitochondrial F0 complex, F6                                                   | -1.5 | subunit of ATP synthase                                                                                                           |
| atp5j: ATP synthase, , subunit F6                                                                                    | +1.3 | subunit of ATP synthase                                                                                                           |
| cox17: COX17 cytochrome c oxidase assembly homolog (yeast)                                                           | +2.1 | subunit of cytochrome c oxidase (COX), respiration                                                                                |
| cox4nb: cox4 neighbor                                                                                                | +1.8 | subunit of cytochrome c oxidase (COX), respiration                                                                                |
| cox7a2l: cytochrome c oxidase subunit VIIa polypeptide 2 like                                                        | +1.2 | subunit of cytochrome c oxidase (COX), respiration                                                                                |
| cox6b1: cytochrome c oxidase subunit Vib polypeptide 1 (ubiquitous)                                                  | -1.5 |                                                                                                                                   |
| nnt: nicotinamide nucleotide transhydrogenase                                                                        | -1.3 | transhydrogenation between NADH and NADP                                                                                          |
| ndufs6: NADH dehydrogenase (ubiquinone) Fe-S protein 6, 13kDa (NADH-coenzyme Q reductase)                            | +1.3 | transfer electrons from NADH to the respiratory chain                                                                             |
| aca2: acetyl-Coenzyme A acyltransferase 2                                                                            | -1.3 | first step in mitochondrial fatty acid beta-oxidation                                                                             |
| hadha: hydroxyacyl-Coenzyme A dehydrogenase/3-ketoacyl-Coenzyme A thiolase/enoyl-Coenzyme A hydratase, alpha subunit | -1.6 | beta-oxidation of fatty acids                                                                                                     |
| hadhb: hydroxyacyl-Coenzyme A dehydrogenase, beta subunit                                                            | -2.1 | beta-oxidation of fatty acids                                                                                                     |
| acadm: acyl-Coenzyme A dehydrogenase, long chain                                                                     | -1.8 | beta-oxidation of straight-chain fatty acid                                                                                       |
| <b>BIOSYNTHESIS</b>                                                                                                  |      |                                                                                                                                   |
| me3: malic enzyme 3, NADP(+)-dependent, mitochondrial                                                                | -1.6 | generate NADP+ for biosynthesis                                                                                                   |
| Nme1: non-metastatic cells 1, protein (NM23A)                                                                        | -1.6 | synthesis of nucleoside triphosphates other than ATP                                                                              |
| Pank3: pantothenate kinase 3                                                                                         | -1.5 | biosynthesis of coenzyme A (CoA)                                                                                                  |
| elovl4: elongation of very long chain fatty acids -like 4                                                            | -3.4 | fatty acids synthesis                                                                                                             |

|                                                                                                                               |       |                                                                                                  |
|-------------------------------------------------------------------------------------------------------------------------------|-------|--------------------------------------------------------------------------------------------------|
| hsdl2: hydroxysteroid dehydrogenase like 2                                                                                    | -1.6  | sterol synthesis, transporter                                                                    |
| scp2: sterol carrier protein 2                                                                                                | -1.4  | sterol synthesis, transporter                                                                    |
| bckdk: branched chain ketoacid dehydrogenase kinase                                                                           | -1.5  | biosynthesis                                                                                     |
| pdp5: protein disulfide isomerase-related protein (provisional)                                                               | -1.7  | formation and rearrangement of disulfide bonds                                                   |
| papss1: 3'-phosphoadenosine 5'-phosphosulfate synthase 1                                                                      | -1.5  |                                                                                                  |
| papss2: 3'-phosphoadenosine 5'-phosphosulfate synthase 2                                                                      | -1.7  |                                                                                                  |
| sulf2: sulfatase 2                                                                                                            | -1.6  | removes 6-O-sulfate groups from heparan sulfate                                                  |
| insig1: insulin induced gene 1                                                                                                | +2.1  | negative regulation of cholesterol synthesis                                                     |
| papss2: 3'-phosphoadenosine 5'-phosphosulfate synthase 2                                                                      | -1.7  | sulfation                                                                                        |
| serinc1: serine incorporator 1                                                                                                | -1.7  | incorporates serine into phosphatidylserine /sphingolipic                                        |
| adsl: adenylosuccinate lyase                                                                                                  | -1.3  | synthesis of purines                                                                             |
| gnmt: glycine N-methyltransferase                                                                                             | -1.3  | converts S-adenosyl-L-methionine (along with glycine) to S-adenosyl-L-homocysteine and sarcosine |
| ces2: carboxylesterase 2 (intestine, liver)                                                                                   | -2.3  |                                                                                                  |
| ctps: CTP synthase                                                                                                            | +1.8  | CTP synthesis                                                                                    |
| cad: carbamoyl-phosphate synthetase 2, aspartate transcarbamylase                                                             | +1.9  | pyrimidine nucleotides byosynthesis                                                              |
| uprt: uracil phosphoribosyltransferase (FUR1) homolog (S. cerev.)                                                             | +1.8  | pyrimidine nucleotides byosynthesis                                                              |
| impdh2: IMP (inosine monophosphate) dehydrogenase 2                                                                           | +1.6  | guanine nucleotides synthesis                                                                    |
| pck1: (phosphoenolpyruvate carboxykinase 1                                                                                    | +4    | gluconeogenesis formation of phosphoenolpyruvate                                                 |
| elov15: ELOVL family member 5, elongation of long chain fatty acids (FEN1/Elo2, SUR4/Elo3-like, yeast)                        | +3.2  |                                                                                                  |
| hsd17b12a: hydroxysteroid (17-beta) dehydrogenase 12a                                                                         | +1.5  | 3-ketoacyl-CoA to 3-hydro fatty acid/estrone to estradio                                         |
| gad1: glutamate decarboxylase 1 (brain, 67kDa)                                                                                | -1.9  | catalyzes the production of GABA                                                                 |
| acat1: acetyl-Coenzyme A acetyltransferase 1 (acetoacetyl Coenzyme A thiolase)                                                | -1.6  | forms acetoacetyl-CoA from two mol of acetyl-CoA                                                 |
| adsl: adenylosuccinate lyase                                                                                                  | -1.3  | deficiency - alpha-methylacetoaceticaciduria disorder                                            |
| asns: asparagine synthetase                                                                                                   | +1.8  | synthesis of purines, AMP                                                                        |
| gale: UDP-galactose-4-epimerase                                                                                               | +1.3  | synthesis of asparagine                                                                          |
| gmppb: GDP-mannose pyrophosphorylase B                                                                                        | +1.4  | UDP-glucose to UDP-galactose and UDP-N-acetylglucosamine to UDP-N-acetylgalactosamine            |
| hsd17b12: hydroxysteroid (17-beta) dehydrogenase 12                                                                           | +1.5  | production of N-linked oligosaccharides                                                          |
| hsd17b8: hydroxysteroid (17-beta) dehydrogenase 8                                                                             | -1.7  | 3-ketoacyl-CoA to 3-hydroxyacyl, fatty acid elongation                                           |
| kmo: kynurenine 3-monooxygenase (kynurenine 3-hydroxylase)                                                                    | -1.8  | estrogens and androgens                                                                          |
| ftcd: formiminotransferase cyclodeaminase                                                                                     | -1.8  | synthesis of quinolinic acid                                                                     |
| lfng: LFNG O-fucosylpeptide 3-beta-N-acetylglucosaminyltransferase                                                            | +1.6  | one-carbon unit from formiminoglutamate to folate                                                |
| mat1a: methionine adenosyltransferase I, alpha                                                                                | -1.4  | adding an N-acetylglucosamine to the fucose in receptor                                          |
| nmnat2: nicotinamide nucleotide adenylyltransferase 2                                                                         | -1.6  | forms S-adenosylmethionine from methionine and ATP                                               |
| sult6b1: sulfotransferase family, cytosolic, 6B, member 1                                                                     | +1.8  | NAD (NADP) biosynthetic pathway                                                                  |
| nat13: N-acetyltransferase 13                                                                                                 | +1.6  | may catalyze the sulfate conjugation                                                             |
| nat10: N-acetyltransferase 10                                                                                                 | +2.0  | acetylates N-ends of polypeptides                                                                |
| nat5: N-acetyltransferase 5                                                                                                   | +1.4  |                                                                                                  |
| nat8l: N-acetyltransferase 8-like                                                                                             | +1.6  |                                                                                                  |
| ogt: O-linked N-acetylglucosamine (GlcNAc) transferase (UDP-N-acetylglucosamine:polypeptide-N-acetylglucosaminyl transferase) | -1.4  | adds N-acetylglucosamine in O-glycosidic linkage to Se or Thre residues                          |
| padi2: peptidyl arginine deiminase, type II                                                                                   | -1.8  | post-translational deimination of proteins                                                       |
| phgdh: phosphoglycerate dehydrogenase                                                                                         | +1.3  | rate-limiting step in the serine biosynthesis                                                    |
| ppil3: peptidylprolyl isomerase (cyclophilin)-like 3                                                                          | +1.8  | isomerization peptid bonds, protein folding                                                      |
| ppat: phosphoribosyl pyrophosphate amidotransferase                                                                           | +2.2  | purine nucleotide biosynthesis                                                                   |
| psat1: phosphoribosyl pyrophosphate amidotransferase                                                                          | +1.3  | 3-phosphohydroxypyruvate to phosphoserine                                                        |
| nsfl1c: NSFL1 (p97) cofactor (p47)                                                                                            | -1.3  | regrowth of Golgi cisternae from mitotic Golgi fragmen                                           |
| mboat1: membrane bound O-acyltransferase domain containing 1                                                                  | +2.2  | converts lysophosphatidylethanolamine/serine to phosphatidylethanolamine and phosphatidylserine  |
| gch1: GTP cyclohydrolase 1 (dopa-responsive dystonia)                                                                         | -1.3  | rate-limiting enzyme in tetrahydrobiopterin (BH4) biosynthesis                                   |
| odc1, ornithine decarboxylase 1                                                                                               | +2.4  | polyamine biosynthesis ornithine to putrescine,                                                  |
| pcbdl: 6-pyruvoyl-tetrahydropterin synthase                                                                                   | +1.4  | tetrahydrobiopterin biosynthesis                                                                 |
| CATABOLISM                                                                                                                    |       |                                                                                                  |
| cyp24a1: cytochrome P450, family 24, subfamily A, polypeptide 1                                                               | +10.3 | vitamin D catabolism                                                                             |

|                                                                       |      |                                                            |
|-----------------------------------------------------------------------|------|------------------------------------------------------------|
| cyp27c1: cytochrome P450, family 27, subfamily C, polypeptide 1       | +2.4 |                                                            |
| cathepsin L, 1 b                                                      | +3   | lysosomal cysteine proteinase                              |
| ctsl1a: cathepsin L1, a                                               | +1.8 | lysosomal cysteine proteinase                              |
| ctsl1: cathepsin L, like                                              | +5.2 | lysosomal cysteine proteinase                              |
| ctsf: cathepsin F                                                     | -1.4 | peptidase                                                  |
| tbl3: transducin (beta)-like 3                                        | +1.7 | peptidase                                                  |
| psap: prosaposin                                                      | +1.8 | catabolize glycosphingolipids                              |
| gcdhl: glutaryl-Coenzyme A dehydrogenase, like                        | -6.1 | degradative Lys, HLys, and Thp metabolism                  |
| 6-29kD-proteinase, cathepsin K                                        | -2.1 | bone resorption                                            |
| fpgs: folylpolyglutamate synthase                                     | +2.6 | folate metabolism                                          |
| prmt7: protein arginine N-methyltransferase 7                         | +2.1 | arginine methylation, ST, RNA transport, and splicing      |
| prmt1: protein arginine methyltransferase 1                           | +1.3 |                                                            |
| prmt3: protein arginine methyltransferase 3                           | +3.6 |                                                            |
| prmt5: protein arginine methyltransferase 5                           | +1.9 |                                                            |
| gldc /// LOC795637: glycine dehydrogenase (decarboxylating            | +1.8 | degradation of glycine                                     |
| smfn: small fragment nuclease                                         | +1.8 | degrades DNA                                               |
| mtap: methylthioadenosine phosphorylase                               | +1.7 | salvage of adenine and methionine                          |
| cstf3: cleavage stimulation factor, 3' pre-RNA, subunit 3             | +1.8 | pre-mRNA 3'-end formation, polyadenilation                 |
| cbs: cystathionine-beta-synthase                                      | +1.7 | transsulfuration, first step homocysteine to cystathionine |
| aga: aspartylglucosaminidase                                          | +1.7 | catabolism of N-linked oligosaccharides                    |
| psme3: proteasome activator subunit 3                                 | +1.5 | cleave peptides in an ATP/ubiquitin-dependent process      |
| psmb6: proteasome (prosome, macropain) subunit, beta type, 6          | +1.3 | proteasome                                                 |
| psmd1:proteasome (prosome macropain) 26S subunit, non-ATPase,1        | -1.4 | proteasome                                                 |
| psmd2:proteasome (prosome macropain) 26S subunit, non-ATPase,2        | -1.4 | proteasome                                                 |
| prss36: protease, serine, 36                                          | +1.5 | protease, extracellular space                              |
| aup1: ancient ubiquitous protein 1                                    | +1.9 | degradation of misfolded proteins by the proteasome        |
| glud2: glutamate dehydrogenase 2                                      | -1.3 | glutamate recycling during neurotransmission               |
| ppap2a: phosphatidic acid phosphatase type 2A                         | +1.5 | phosphatase                                                |
| thop1: thimet oligopeptidase 1                                        | -1.5 | oligopeptidase                                             |
| dual specificity phosphatase 6                                        | +1.4 | phosphatase                                                |
| st14: suppression of tumorigenicity 14 (colon carcinoma)              | +1.4 | peptidase                                                  |
| rhbd13: rhomboid, veinlet-like 3 (Drosophila)                         | +2.4 | peptidase                                                  |
| ncln: nicalin homolog (zebrafish)                                     | +2.1 | peptidase                                                  |
| cpn1: carboxypeptidase N, polypeptide 1                               | +1.3 | peptidase                                                  |
| cpe: carboxypeptidase E                                               | -1.7 | peptidase                                                  |
| cast: calpastatin                                                     | +1.3 | peptidase                                                  |
| 2310051m13: RIKEN cDNA 2310051M13 gene                                | +2.3 | peptidase                                                  |
| ADAM23: ADAM metallopeptidase domain 23                               | -2.3 | peptidase                                                  |
| abhd14e: abhydrolase domain containing 14B                            | -1.5 |                                                            |
| ardia: ARD1 homolog A, N-acetyltransferase (S. cerevisiae)            | +1.5 |                                                            |
| asnsd1: asparagine synthetase domain containing 1                     | +2   |                                                            |
| bckdha: branched chain keto acid dehydrogenase E1, alpha peptide      | +1.3 | dehydrogenase                                              |
| enpp1: ectonucleotide pyrophosphatase/phosphodiesterase 1             | -1.3 | ATP hydrolysis, pyrophosphate levels                       |
| fahd2a: fumarylacetoacetate hydrolase domain containing 2A            | -1.5 | may have hydrolase activity                                |
| gnpda1: glucosamine-6-phosphate deaminase 1                           | +1.5 | D-glucosamine-6-phosphate into D-fructose-6-phosphat       |
| lipa: lipase A, lysosomal acid, cholesterol esterase (Wolman disease) | -1.3 | hydrolysis of cholesteryl esters and triglycerides         |
| mettlb2: methyltransferase like 2B                                    | +1.9 | probable methyltransferase (by similarity)                 |
| qdpr: quinoid dihydropteridine reductase                              | +2.9 | pterin-dependent aromatic a.a. hydroxylating systems       |
| rexo2: REX2, RNA exonuclease 2 homolog (S. cerevisiae)                | +1.8 | 3'-to-5' exoribonuclease on small oligoribonucleotides     |
| rpe: ribulose-5-phosphate-3-epimerase                                 | +1.5 | pentose phosphate cycle                                    |
| sardh: sarcosine dehydrogenase                                        | -1.4 | oxidative demethylation of sarcosine to glycine            |
| sat1: spermidine/spermine N1-acetyltransferase 1                      | +1.5 | catabolic pathway of polyamine metabolism                  |
| tdh: L-threonine dehydrogenase                                        | +1.5 | L-threonine degradation                                    |
| tkl2: transketolase-like 2                                            | +1.5 | pentose phosphate pathway                                  |
| hpd1: 4-hydroxyphenylpyruvate dioxygenase-like                        | +3   | aromatic amino acid family metabolic process               |
| ola1: Obg-like ATPase 1                                               | +1.4 | ATP catabolic process                                      |
| nob1: NIN1/RPN12 binding protein 1 homolog (S. cerevisiae)            | +1.8 | may play a role in mRNA degradation                        |



|                                                                                                              |      |                                                                                       |
|--------------------------------------------------------------------------------------------------------------|------|---------------------------------------------------------------------------------------|
| usp36: ubiquitin specific peptidase 36                                                                       | +2.2 | cleaving ubiquitin                                                                    |
| usp1: ubiquitin specific peptidase 1                                                                         | +1.4 | cleaving ubiquitin                                                                    |
| ubl5: ubiquitin-like 5                                                                                       | +1.3 | reversible modulator of ubiquitin function                                            |
| ubtd2: ubiquitin domain containing 2                                                                         | -1.6 | regulatory?                                                                           |
| urm1: ubiquitin related modifier 1 homolog (S. cerevisiae)                                                   | +1.3 | reversible modulator of ubiquitin function                                            |
| uba: ubiquitin-like modifier activating enzyme 2                                                             | +1.4 | E1 ligase for SUMO proteins                                                           |
| ube2v2: ubiquitin-conjugating enzyme E2 variant 2                                                            | +1.3 | non-canonical poly-ubiquitin chains, activates NF-kB                                  |
| uchl3: ubiquitin carboxyl-terminal esterase L3 (ubiquitin thiolesterase)                                     | +1.5 | hydrolyzes bond C-term. glycine of ubiquitin or NEDD8                                 |
| rbx1: ring-box 1                                                                                             | +1.4 | mediate the ubiquitination                                                            |
| fbxo42: F-box protein 42                                                                                     | +1.3 | E3 ubiquitin ligase complex                                                           |
| fbxo28: F-box protein 28                                                                                     | +1.3 | E3 ubiquitin ligase complex                                                           |
| wwp2: WW domain containing E3 ubiquitin protein ligase 2                                                     | -1.6 | transfers the ubiquitin to targeted substrates                                        |
| <b>OTHER MITOCHONDRIAL</b>                                                                                   |      |                                                                                       |
| clic4:chloride intracellular channel 4                                                                       | +1.4 | transporter                                                                           |
| mthfd2: methylenetetrahydrofolate dehydrogenase (NADP+ dependent) 2, methenyltetrahydrofolate cyclohydrolase | +1.4 | glyoxylate and dicarboxylate metabolism                                               |
| slc25a33: solute carrier family 25, member 33                                                                | +1.4 | transporter                                                                           |
| hibadh: 3-hydroxyisobutyrate dehydrogenase                                                                   | +1.3 | dehydrogenase                                                                         |
| auh: AU RNA binding protein/enoyl-Coenzyme A hydratase                                                       | +1.6 | metabolism of RNAs and leucine                                                        |
| ndufab1: NADH dehydrogenase (ubiquinone) 1, alpha/beta subcomplex, 1, 8kDa                                   | +1.3 | carrier of the growing fatty acid chain in fatty acid biosynthesis in mitochondria    |
| crls1: cardiolipin synthase                                                                                  | +2.5 | phosphatidyltransferase                                                               |
| fxn: frataxin                                                                                                | +2.6 | iron transport and respiration                                                        |
| pprc1: peroxisome proliferator-activated receptor gamma, coactivator-rel 1                                   | +2.3 | activates mitochondrial biogenesis through NRF1                                       |
| ptpmt1: protein tyrosine phosphatase, mitochondrial 1                                                        | +2.2 | dephosphorylation of mitochondrial proteins, ATP make                                 |
| timm44: translocase of inner mitochondrial membrane 44 homolog                                               | +2.1 | component of PAM complex peptide translocation, ATP                                   |
| mrrf: mitochondrial ribosome recycling factor                                                                | +2   | release of ribosomes from messenger RNA, translation                                  |
| grpel1: GrpE-like 1, mitochondrial                                                                           | +2   | component of PAM complex                                                              |
| slc25a25: solute carrier family 25 (mitochondrial phosphate carrier)                                         | +1.9 | calcium-dependent mitochondrial solute carrier.                                       |
| slc25a26: solute carrier family 25, member 26                                                                | +2.0 | S-adenosylmethionine (SAM) transport                                                  |
| ucp4: uncoupling protein 4                                                                                   | +1.9 | uncoupling oxidative phosphorylation                                                  |
| timm50: translocase of inner mitochondrial membrane 50 homolog                                               | +1.8 | component of the TIM23 complex proteins translocation                                 |
| timm9: translocase of inner mitochondrial membrane 9 homolog                                                 | +1.5 | transporter                                                                           |
| timm17a: translocase of inner mitochondrial membrane 17 homolog                                              | +1.4 | transporter                                                                           |
| timm8b: translocase of inner mitochondrial membrane 8 homolog B                                              | +1.6 | chaperone, hydrophobic proteins into the inner membrane                               |
| tomm20: translocase of outer mitochondrial membrane 20 homolog                                               | +1.8 | transport cytosolically synthesized mitochondrial protein                             |
| atpaf2: ATP synthase mitochondrial F1 complex assembly factor 2                                              | +1.7 | ATP synthase                                                                          |
| atpaf1: ATP synthase mitochondrial F1 complex assembly factor 1                                              | +1.5 |                                                                                       |
| tomm22: translocase of outer mitochondrial membrane 22 homolog                                               | +1.5 | transport cytosolically synthesized mitochondrial protein                             |
| tomm40: translocase of outer mitochondrial membrane 40 homolog                                               | +1.5 | transport cytosolically synthesized mitochondrial protein                             |
| timm17a: translocase of inner mitochondrial membrane 17 homolog A                                            | +1.4 | component of the TIM23 complex                                                        |
| timm44: translocase of inner mitochondrial membrane 44 homolog                                               | +2.1 | transporter                                                                           |
| bcat2: branched chain aminotransferase 2, mitochondrial                                                      | +1.3 | catabolism of leucine, isoleucine, and valine                                         |
| pck2: phosphoenolpyruvate carboxykinase 2 (mitochondrial)                                                    |      |                                                                                       |
| atad3b: ATPase family, AAA domain containing 3B                                                              | +1.6 | stabilization mtDNA-protein complexes called nucleoid:                                |
| atad3a: ATPase family, AAA domain containing 3A                                                              | +1.6 | H+ transporting, mitochondrial F0 complex                                             |
| slc25a4: solute carrier family 25, member 4                                                                  | -2.7 | adenine nucleotide translocator                                                       |
| fastkd2: FAST kinase domains 2                                                                               | +1.9 | mitochondrial apoptosis, cytochrome c oxidase                                         |
| phb: prohibitin                                                                                              | +2.1 | inhibit DNA synthesis and proliferation increases 3-fold                              |
|                                                                                                              |      | in G1 phase, respiration aging                                                        |
| phb2: prohibitin 2                                                                                           | +1.6 | mediator of transcriptional repression by nuclear hormone receptors respiration aging |
|                                                                                                              |      |                                                                                       |
| mrpl3: mitochondrial ribosomal protein L3                                                                    | +1.4 | mitochondrial ribosomal protein                                                       |
| mrpl9: mitochondrial ribosomal protein L9                                                                    | +1.8 | mitochondrial ribosomal protein                                                       |
| mrpl12: mitochondrial ribosomal protein L12                                                                  | +1.8 | mitochondrial ribosomal protein                                                       |

|                                               |      |                                            |
|-----------------------------------------------|------|--------------------------------------------|
| mrpl14: mitochondrial ribosomal protein L14   | +1.3 | mitochondrial ribosomal protein            |
| mrpl15: mitochondrial ribosomal protein L15   | +1.8 | mitochondrial ribosomal protein            |
| mrpl18: mitochondrial ribosomal protein L18   | +1.4 | mitochondrial ribosomal protein            |
| mrpl19: mitochondrial ribosomal protein L19   | +1.6 | mitochondrial ribosomal protein            |
| mrpl27: mitochondrial ribosomal protein L27   | +1.9 | mitochondrial ribosomal protein            |
| mrpl28: mitochondrial ribosomal protein L28   | +1.4 | mitochondrial ribosomal protein            |
| mrpl30: mitochondrial ribosomal protein L30   | +1.9 | mitochondrial ribosomal protein            |
| mrpl35: mitochondrial ribosomal protein L35   | +1.6 | mitochondrial ribosomal protein            |
| mrpl37: mitochondrial ribosomal protein L37   | +1.5 | mitochondrial ribosomal protein            |
| mrpl38: mitochondrial ribosomal protein L38   | +1.4 | mitochondrial ribosomal protein            |
| mrpl42: mitochondrial ribosomal protein L42   | +2.1 | mitochondrial ribosomal protein            |
| mrpl44: mitochondrial ribosomal protein L44   | +1.4 | mitochondrial ribosomal protein            |
| mrpl45: mitochondrial ribosomal protein L45   | +1.6 | mitochondrial ribosomal protein            |
| mrpl48: mitochondrial ribosomal protein L48   | +1.5 | mitochondrial ribosomal protein            |
| mrpl52: mitochondrial ribosomal protein L52   | +1.9 | mitochondrial ribosomal protein            |
| mrpl53: mitochondrial ribosomal protein L53   | +1.5 | mitochondrial ribosomal protein            |
| mrpl54: mitochondrial ribosomal protein L54   | +1.3 | mitochondrial ribosomal protein            |
| mrpl55: mitochondrial ribosomal protein L55   | +1.5 | mitochondrial ribosomal protein            |
| mrp63: mitochondrial ribosomal protein 63     | +1.6 | mitochondrial ribosomal protein            |
| mrps5: mitochondrial ribosomal protein S5     | +1.5 | mitochondrial ribosomal protein            |
| mrps6: mitochondrial ribosomal protein S6     | +1.3 | mitochondrial ribosomal protein            |
| mrps10: mitochondrial ribosomal protein S10   | +1.8 | mitochondrial ribosomal protein            |
| mrps15: mitochondrial ribosomal protein S15   | +1.8 | mitochondrial ribosomal protein            |
| mrps18a: mitochondrial ribosomal protein S18A | +1.9 | mitochondrial ribosomal protein            |
| mrps18b: mitochondrial ribosomal protein S18B | +2.1 | mitochondrial ribosomal protein            |
| mrps18c: mitochondrial ribosomal protein S18C | +2.1 | mitochondrial ribosomal protein            |
| mrps24: mitochondrial ribosomal protein S24   | +1.5 | mitochondrial ribosomal protein            |
| mrps26: mitochondrial ribosomal protein S26   | +1.8 | mitochondrial ribosomal protein            |
| mrps31: mitochondrial ribosomal protein S31   | +1.5 | mitochondrial ribosomal protein            |
| mrps35: mitochondrial ribosomal protein S35   | +1.7 | mitochondrial ribosomal protein            |
| dap3: death associated protein 3              | +1.8 | mitochondrial ribosome 28S subunit protein |
| mrrf: mitochondrial ribosome recycling factor | +1.9 |                                            |

### Supplemental Table 3

#### Expression of genes functioning in cytoskeleton and extracellular matrix

| gene                                                                                                              | fold  | function                                            |
|-------------------------------------------------------------------------------------------------------------------|-------|-----------------------------------------------------|
| <b>FILAMENTS</b>                                                                                                  |       |                                                     |
| myhz1: myosin, heavy polypeptide 1, skeletal muscle                                                               | -2.2  | cytoskeleton, skeletal muscle                       |
| myhc4: myosin, heavy polypeptide 1 like                                                                           | -1.9  | fast muscle                                         |
| vmhc: ventricular myosin heavy chain                                                                              | -1.7  | cardiac                                             |
| mylz3: myosin, light polypeptide 3, skeletal muscle                                                               | -1.5  | skeletal muscle                                     |
| myl1: myosin, light chain 1, alkali; skeletal, fast                                                               | -1.3  |                                                     |
| myl4: myosin, light chain 4, alkali; atrial, embryonic                                                            | +1.5  |                                                     |
| mylc2pl: myosin light chain 2, precursor lymphocyte-specific                                                      | +1.4  |                                                     |
| tmod4: tropomodulin 4 (muscle)                                                                                    | -2.0  | blocks elongation of actin filament                 |
| tpma: alpha-tropomyosin                                                                                           | -1.4  | actin filament assembly                             |
| tpm4: tropomyosin 4                                                                                               | -1.7  | actin filament assembly                             |
| add1: adducin 1 (alpha)                                                                                           | -1.4  | actin filament assembly                             |
| tmsb: thymosin, beta                                                                                              | -2.2  | growth/assembly of actin filament                   |
| myl9: myosin, light polypeptide 9                                                                                 | +1.5  | regulatory                                          |
| cmhc1: cardiac myosin light chain-1                                                                               | +1.5  | cardiac                                             |
| gsnb: gelsolin b, similar to Gsn protein                                                                          | -1.5  | actin-binding                                       |
| capg: capping protein (actin filament), gelsolin-like                                                             | +1.3  | actin-binding                                       |
| twfla: twinfilin, actin-binding protein, homolog 1a                                                               | -1.4  | actin-binding                                       |
| coro1b: coronin, actin binding protein, 1B                                                                        | -1.7  | actin-binding                                       |
| icat: beta-catenin-interacting protein                                                                            | -1.9  | beta-catenin binding                                |
| smarcd1: SWI/SNF related, matrix associated, actin dependent regulator of chromatin, family d, member 1           | +1.3  | actin-dependent                                     |
| scinla: scinderin like a                                                                                          | -1.8  | ac filament-severing, exocytosis                    |
| ivns1abpa: influenza virus NS1A binding protein a                                                                 | -1.7  | stabilizer of actin filaments                       |
| pdlim1: PDZ and LIM domain 1 (elfin)                                                                              | +1.8  | actin stress fiber formation                        |
| emd: emerin (Emery-Dreifuss muscular dystrophy)                                                                   | +1.7  | membrane/cytoskeleton anchorage                     |
| tnnt3a: troponin T3a, skeletal, fast                                                                              | -1.6  | thin filament regulatory complex                    |
| xirp2: xin actin-binding repeat containing 2                                                                      | +1.5  |                                                     |
| fscn1: fascin homolog 1, actin-bundling protein (Strongylocentrotus purpuratus)                                   | -1.4  |                                                     |
| actr1b: ARP1 actin-related protein 1 homolog B, centractin beta (yeast)                                           | -1.4  |                                                     |
| actn3: actinin, alpha 3                                                                                           | -1.9  |                                                     |
| nexn: nexilin (F actin binding protein)                                                                           | +1.4  | F actin binding protein, cell migrat                |
| marcks: myristoylated alanine-rich protein kinase C substr                                                        | -1.7  | actin filament crosslinking protein                 |
| gfap: glial fibrillary acidic protein                                                                             | -1.4  | intermediate filament of astrocytes                 |
| evlb: Enah/Vasp-like b                                                                                            | -1.6  | actin nucleation polymerization                     |
| cd2ap: CD2-associated protein                                                                                     | +1.4  | adapter between membrane and the actin cytoskeleton |
| krt1-19d: keratin, type 1, gene 19d                                                                               | -1.6  | spinous/granular layers of epidermis                |
| krt5: keratin 5                                                                                                   | -2.6  | basal layer of the epidermis                        |
| krt1-19d: keratin, type 1, gene 19d                                                                               | -3.1  | myofibers, expressed in the periderm                |
| krt15: keratin 15                                                                                                 | -5.4  | basal cell layer                                    |
| krt12: keratin 12                                                                                                 | -2.6  |                                                     |
| krt14: keratin 14 (epidermolysis bullosa simplex, Dowling-Meara, Koebner)keratin, type 2 cytoskeletal 8, BE202093 | -3.6  |                                                     |
| similar to keratin type 2, BE605275                                                                               | -20.6 | pairs with 18, deficit-pancreatitis                 |
| si:dkeyp-113d7.4, cytokeratin                                                                                     | -11.9 | proliferation, keratinization                       |
| krt18: keratin 18                                                                                                 | -2.6  |                                                     |
| krt18: keratin 18                                                                                                 | +2.1  | type I intermediate filament chain                  |
| krt13: keratin 13                                                                                                 | +1.4  |                                                     |
| desm: desmin                                                                                                      | +2    | intermed filaments muscle                           |
| scel: sciellin                                                                                                    | +1.5  | cornified envelope of keratinocytes                 |
| <b>MICROTUBULES</b>                                                                                               |       |                                                     |
| tuba1: tubulin, alpha 1                                                                                           | -1.8  | microtubules                                        |

|                                                                                                      |       |                                          |
|------------------------------------------------------------------------------------------------------|-------|------------------------------------------|
| tuba8l3: tubulin, alpha 8 like 3                                                                     | -1.5  | microtubules                             |
| tuba1: similar to alpha-tubulin isotype M-alpha-2                                                    | -1.6  | microtubules                             |
| tuba2: Tubulin, alpha 2                                                                              | -2.3  | microtubules                             |
| tubb5: tubulin, beta 5                                                                               | -2.2  | microtubules                             |
| tubb2a: tubulin, beta 2A                                                                             | -1.4  | microtubules                             |
| tubb3: tubulin, beta 3                                                                               | -1.7  | microtubules                             |
| tubb4: tubulin, beta 4                                                                               | -2.0  | microtubules                             |
| tuba4a: tubulin, alpha 4a                                                                            | -1.4  | microtubules                             |
| tuba3c: tubulin, alpha 3c                                                                            | -2.2  | microtubules                             |
| tuba1c: tubulin, alpha 1c                                                                            | -1.8  | microtubules                             |
| eml2: echinoderm microtubule associated protein like 2                                               | -1.8  | microtubules                             |
| map1lc3a: microtubule-associated protein 1 light chain 3 alpha                                       | -1.6  | microtubules                             |
| map1lc3b: microtubule-associated protein 1 light chain 3 beta                                        | -1.4  | microtubules                             |
| dynll2: dynein, light chain, LC8-type 2                                                              | +1.3  | transport                                |
| klc1: kinesin light chain 1                                                                          | +1.7  | may couple cargo to heavy chain          |
| klc4: kinesin light chain 4                                                                          | +1.7  |                                          |
| kif1b: kinesin family member 1B                                                                      | -1.8  | transport mitochondria synaptic vesicle  |
| kif20a: kinesin family member 20A                                                                    | -2.5  |                                          |
| bfsp2: beaded filament structural protein 2, phakinin                                                | -3.6  |                                          |
| <b>EXTRACELLULAR MATRIX</b>                                                                          |       |                                          |
| col11a1/col11a2: collagen type XI alpha-2 /alpha 1                                                   | -1.8  | extracellular matrix                     |
| col1a1: collagen, type I, alpha 1                                                                    | -2.2  | extracellular matrix                     |
| col9a2: procollagen, type IX, alpha 2                                                                | -2.1  | extracellular matrix                     |
| col9a3: collagen, type IX, alpha 3                                                                   | -1.9  | extracellular matrix                     |
| col5a2: collagen, type V, alpha 2                                                                    | -1.7  | extracellular matrix                     |
| col1a3/dcxr: collagen, type I, alpha 3/dicarbonyl/L-xylulose reductase                               | -2.2  | extracellular matrix                     |
| col2a1a: collagen type II, alpha-1a                                                                  | -2.2  | extracellular matrix                     |
| col1a2: collagen, type I, alpha 2                                                                    | -2.8  | extracellular matrix                     |
| col10a1: collagen, type X, alpha 1                                                                   | -35.6 | extracellular matrix                     |
| spon2b: spondin 2b, extracellular matrix protein                                                     | -3.8  | extracellular matrix                     |
| dcn: decorin                                                                                         | -2.2  | binds collagen matrix assembly           |
| tgfbi: transforming growth factor, beta-induced, 68kDa                                               | -1.5  | binds I, II, IV collagens, cell adhesion |
| thbs4b: thrombospondin 4b                                                                            | -1.9  | cell-to-cell/cell-to-matrix bind         |
| thbs1: thrombospondin 1                                                                              | +2.2  | cell to matrix to cell interaction       |
| vcamb: versican b                                                                                    | -2.5  | cell to matrix, glia                     |
| hapln1a: Hyaluronan and proteoglycan link protein 1a                                                 | -1.7  | proteoglycan - hyaluronic acid           |
| rtk6: eph-like receptor tyrosine kinase 6                                                            | +1.9  | activated by collagen, cell/cell         |
| fn1b: fibronectin 1b                                                                                 | +1.8  | cell adhesion, motility, shape           |
| p4ha1: procollagen-proline,2-oxoglutarate 4-dioxygenase (proline 4-hydroxylase), alpha polypeptide 1 | +3.2  | collagen matrix synthesis                |
| optc: Opticin                                                                                        | +9    | binds collagen fibrils                   |
| mmp9: matrix metalloproteinase 9                                                                     | +9.8  | matrix degradation                       |
| mmp13: matrix metalloproteinase 13                                                                   | +3.3  | matrix degradation                       |
| pitrm1: pitrilysin metalloproteinase 1                                                               | +1.5  | matrix degradation                       |
| timp2b: tissue inhibitor of metalloproteinase 2b                                                     | +8    | matrix degradation                       |
| sparc: secreted protein, acidic, cysteine-rich (osteonectin)                                         | -1.5  | extracellular space                      |
| fgg: fibrinogen gamma chain                                                                          | +1.5  |                                          |
| fgb: fibrinogen beta chain                                                                           | +1.6  |                                          |
| fga: fibrinogen alpha chain                                                                          | +1.7  |                                          |
| efemp2: EGF-containing fibulin-like extracellular matrix protein 2                                   | +1.5  |                                          |
| cyr61: cysteine-rich, angiogenic inducer, 61                                                         | +2.2  |                                          |
| crtap: cartilage associated protein                                                                  | +1.3  |                                          |
| aplp1: amyloid beta (A4) precursor-like protein 1                                                    | -1.7  |                                          |
| app: amyloid beta (A4) precursor protein (peptidase nexin-II, Alzheimer disease)                     | -1.4  |                                          |
| appbp2: amyloid beta precursor protein (cytoplasmic tail) binding protein 2                          | -1.3  |                                          |
| aamp: angio-associated, migratory cell protein                                                       | -1.6  |                                          |
| ctgf: connective tissue growth factor                                                                | +1.9  |                                          |
| oc90: otoconin 90                                                                                    | +2.7  |                                          |

|                                                               |      |                                                                       |
|---------------------------------------------------------------|------|-----------------------------------------------------------------------|
| krtcap2: keratinocyte associated protein 2                    | -1.3 |                                                                       |
| hs6st2: heparan sulfate 6-O-sulfotransferase 2                | +1.5 |                                                                       |
| muc2: mucin 2                                                 | -1.7 | insoluble barrier that protects epithel                               |
| adam17a: a disintegrin and metalloproteinase domain 17a       | +1.5 | shedding of TNFalpha                                                  |
| cxadr: coxsackie virus and adenovirus receptor                | +2.1 | cell adhesion                                                         |
| cdh1: cadherin 1, epithelial                                  | +2.1 | cell adhesion                                                         |
| cdh17: cadherin 17, LI cadherin (liver-intestine)             | +1.6 | cell adhesion                                                         |
| cdh11: cadherin 11, osteoblast                                | -1.3 | cell adhesion                                                         |
| pcdh1g: protocadherin 1 gamma                                 | -1.4 | cell adhesion                                                         |
| pcdh2a: protocadherin 2 alpha                                 | -1.8 | cell adhesion                                                         |
| pcdh10b: protocadherin 10b                                    | -1.9 | cell adhesion                                                         |
| dsg2: desmoglein 2 (cadherin family)                          | +2   | component desmosome junction                                          |
| lama5: laminin, alpha 5                                       | +1.4 |                                                                       |
| king1: kininogen 1                                            | +1.4 |                                                                       |
| myoc: myocilin                                                | -2.3 | steroid-responsive meshwork                                           |
| fryl: furry homolog-like (Drosophila)                         | +3.6 | cell polarity                                                         |
| epb4115: erythrocyte membrane protein band 4.1 like 5         | +2   | cell polarity, eye, brain                                             |
| he1: hatching enzyme 1 /// similar to high choriolytic enzyme | +2.1 | Ca /phospholipid-binding                                              |
| sdc4l: syndecan 4 like - heparan sulfate proteoglycan         | +2.1 | focal adhesion, actin stress fibers                                   |
| cldn7: claudin 7                                              | +1.9 | tight junctions                                                       |
| f11r: F11 receptor                                            | +1.3 | epithelial tight junction formation                                   |
| elmo1: engulfment and cell motility 1                         | -1.4 |                                                                       |
| elmo2: engulfment and cell motility 2                         | -2.2 |                                                                       |
| ankra2: ankyrin repeat, family A (RFXANK-like), 2             | -1.8 | endocytosis by linking megalin to cytoskeleton or endocytic machinery |

## Supplemental Table 4

Changes in expression of genes involved in synthesis and processing of ribosomal RNA, other non-coding RNAs, mRNA processing, and translation.

| gene                                                                        | fold  | function                                                                        |
|-----------------------------------------------------------------------------|-------|---------------------------------------------------------------------------------|
| <b>TRANSCRIPTION of NON-CODING RNAs</b>                                     |       |                                                                                 |
| brf1: subunit of RNA pol III transcription initiation factor TFIIB          | +11.4 | synthesis of non-coding RNA                                                     |
| polr3e: polymerase (RNA) III (DNA directed) polypeptide E                   | +2.2  | synthesis of non-coding RNA                                                     |
| polr3f: polymerase (RNA) III (DNA directed) polypeptide F                   | +2.3  | synthesis of non-coding RNA                                                     |
| polr3k: polymerase (RNA) III (DNA directed) polypeptide K                   | +2    | synthesis of non-coding RNA                                                     |
| gtf3aa: general transcription factor IIIAa                                  | +3.7  | polIII transcrip of non-coding RNA                                              |
| ssb: Sjogren syndrome antigen B (autoantigen La)                            | +1.7  | polIII termination factor                                                       |
| tafla: TATA box binding prot, (TBP)-assoc factor, RNA pol I,A               | +2.3  | synthesis of rRNA TAF for RNA polI.                                             |
| polr1c: pol (RNA) I polypeptide C                                           | +2.3  | synthesis of rRNA                                                               |
| polr1a: polymerase (RNA) I polypeptide A                                    | +2.0  | synthesis of rRNA                                                               |
| polr1b: polymerase (RNA) I polypeptide B                                    | +1.9  | synthesis of rRNA                                                               |
| polr1e: polymerase (RNA) I polypeptide E, 53kDa                             | +2.1  | synthesis of rRNA                                                               |
| <b>RIBOSOME BIOGENESIS</b>                                                  |       |                                                                                 |
| imp4: IMP4, U3 small nucleolar ribonucleoprotein                            | +2.9  | rRNA processing                                                                 |
| imp3: IMP3, U3 small nucleolar ribonucleoprotein, homolog (yeast)           | +1.9  | rRNA processing                                                                 |
| rnu3ip2: RNA, U3 small nucleolar interacting protein 2                      | +2.6  | rRNA processing                                                                 |
| mphosph10: M-phase phosphoprotein 10 (U3 small nucleolar ribonucleoprotein) | +2.6  | rRNA processing                                                                 |
| rc11: rc11: RNA terminal phosphate cyclase-like 1                           | +2.0  | pre-rRNA at sites A0, A1 and A2, the 18S                                        |
| dt1p1a10l: hypothetical protein DT1P1A10 (human) - like                     | +3    | may involved in 20S pre-rRNA processing                                         |
| utp15: U3 small nucleolar ribonucleoprotein, homolog                        | +1.9  | rRNA processing                                                                 |
| utp11l: UTP11-like, U3 small nucleolar ribonucleoprotein                    | +1.9  | rRNA processing                                                                 |
| utp6: small subunit (SSU) processome component, homolog                     | +1.8  | rRNA processing                                                                 |
| utp20: small subunit (SSU) processome component, homolog                    | +1.7  | rRNA processing                                                                 |
| utp3: small subunit (SSU) processome component, homolog                     | +2.2  | rRNA processing                                                                 |
| rrp1: ribosomal RNA processing 1 homolog (S. cerevisiae)                    | +2.3  | generation of 28S rRNA                                                          |
| dkc1 /// zgc:110395: dyskeratosis congenita 1, dyskerin                     | +2.3  | (members of the H/ACA snoRNPs (small nucleolar ribonucleoproteins) gene family. |
| nola1: nucleolar protein family A, member 1                                 | +1.8  | rRNA processing and modification)                                               |
| nola2: nucleolar protein family A, member 2                                 | +1.9  |                                                                                 |
| nol1: nucleolar protein 1, 120kDa                                           | +2.0  |                                                                                 |
| nol11: nucleolar protein 11                                                 | +2.2  |                                                                                 |
| nol7: nucleolar protein 7, 27kDa                                            | +2.6  |                                                                                 |
| nola2: nucleolar protein family A, member 2,H/ACA small nucl RNPs           | +1.9  |                                                                                 |
| nolc1: nucleolar and coiled-body phosphoprotein 1                           | +2.2  |                                                                                 |
| nusap1: nucleolar and spindle associated protein 1                          | +1.3  |                                                                                 |
| tsr1: TSR1, 20S rRNA accumulation, homolog (yeast)                          | +2    | 40S subunit maturation                                                          |
| tsr2: TSR2, 20S rRNA accumulation, homolog (S. cerevisiae)                  | +3    | 40S subunit maturation                                                          |
| bop1: block of proliferation 1                                              | +2    | spacer processing to 25S and 5.8S rRNAs                                         |
| bxdc1: brix domain containing 1                                             | +2.4  | processing of 27 SB pre-rRNA to 25S                                             |
| bxdc2: brix domain containing 2                                             | +2    | biogenesis of the 60S ribosomal subunit                                         |
| exosc4: exosome component 2                                                 | +1.8  | (Components of multisubunit particle called                                     |
| exosc5: exosome component 4                                                 | +2.1  | exosome, which mediates mRNA                                                    |
| exosc2: exosome component 5                                                 | +1.9  | degradation. Mediates 3'-processing of the                                      |
| exosc6: exosome component 6                                                 | +1.6  | 7S pre-RNA to the mature 5.8S rRNA)                                             |
| exosc7: exosome component 7                                                 | +1.9  |                                                                                 |
| exosc9: exosome component 9                                                 | +1.8  |                                                                                 |
| exosc10: exosome component 10                                               | +1.6  |                                                                                 |
| nip7: nuclear import 7 homolog (S. cerevisiae)                              | +2.1  | 27S pre-rRNA processing, 60S assembly                                           |
| pa2g4a: proliferation-associated 2G4, a                                     | +1.8  | rRNA processing, ErbB3 signaling                                                |

|                                                                                     |      |                                                                                 |
|-------------------------------------------------------------------------------------|------|---------------------------------------------------------------------------------|
| rrp15: ribosomal RNA processing 15 homolog ( <i>S. cerevisiae</i> )                 | +1.8 | rRNA processing                                                                 |
| rrp9: ribosomal RNA processing 9, small subunit (SSU) processome component          | +2.6 | rRNA processing                                                                 |
| rrs1: ribosome biogenesis regulator homolog ( <i>S. cerevisiae</i> )                | +1.5 | ribosome biogenesis                                                             |
| fb1: fibrillarlin                                                                   | +1.8 | 2'-hydroxyl methylation of ribose in rRNA                                       |
| nol5: nucleolar protein 5                                                           | +2   | 60S ribosomal subunit biogenesis                                                |
| noc4l: nucleolar complex associated 4 homolog ( <i>S. cerevisiae</i> )              | +2.1 | nuclear export of 40 S pre-ribosomes                                            |
| gnl2: guanine nucleotide binding protein-like 2                                     | +2   | nuclear export of pre-60S subunits                                              |
| gnl3l: guanine nucleotide binding protein-like 3                                    | +1.9 | rRNA processing                                                                 |
| nol6: nucleolar protein family 6 (RNA-associated)                                   | +1.7 | rRNA processing                                                                 |
| nol14: nucleolar protein 14                                                         | +1.6 | processing of pre-18S rRNA, export                                              |
| ncl: nucleolin                                                                      | +1.5 | the major nucleolar protein, rRNA                                               |
| pes: pescadillo                                                                     | +2.3 | 60S, cell proliferation, elevated in cancers                                    |
| esf1: ESF1, nucleolar pre-rRNA processing protein, homolog ( <i>S. cerevisiae</i> ) | +2.9 | pre-rRNA processing                                                             |
| sdad1: SDA1 domain containing 1                                                     | +3.7 | pre-60S subunits export to the cytoplasm                                        |
| lsg1: large subunit GTPase 1 homolog ( <i>S. cerevisiae</i> )                       | +2   | nuclear export of the 60S ribosomal subunit                                     |
| gtpbp4: GTP binding protein 4                                                       | +1.5 | biogenesis of the 60S ribosomal subunit                                         |
| grwd1: glutamate-rich WD repeat containing 1                                        | +2.3 | comp. of 50S/80S preribosomal complexes                                         |
| fcf1: FCF1 small subunit (SSU) processome component homolog                         | +2.5 | pre-rRNA processing and 40S assembly                                            |
| cta-126b4.3: CGI-96 protein                                                         | +3.2 | pre-rRNA processing                                                             |
| bysl: bystin-like                                                                   | +1.4 | pre-rRNA processing and 40S assembly                                            |
| dnttip2: deoxynucleotidyltransferase, terminal, interacting protein 2               | +2.7 | regulates the transcriptional activity of DNTT and ESR1, biogenesis 40S subunit |
| <b>OTHER NUCLEOLAR PROTEINS</b>                                                     |      |                                                                                 |
| npm1: nucleophosmin 1 (nucleolar phosphoprotein B23, numatrin)                      | +2.2 | RP assembly, transport, centrosome, ARF                                         |
| mki67ipl: mki67 (FHA domain) interacting                                            | +2.2 | binds Ki67, cell-cycle                                                          |
| pwp2h: PWP2 periodic tryptophan protein homolog                                     | +2.3 | G1 phase of the cell cycle                                                      |
| nolc11: nucleolar and coiled-body phosphoprotein 1-like                             | +2.2 | nucleolus maintenance                                                           |
| noc3l: nucleolar complex associated 3 homolog                                       | +1.7 | may be required for adipogenesis                                                |
| mak16: MAK16 homolog ( <i>S. cerevisiae</i> )                                       | +2.1 | RNA binding                                                                     |
| mybbp1a: myb-binding protein 1a                                                     | +2.5 | c-myb supressor                                                                 |
| cirh1a: cirrhosis, autosomal recessive 1A (cirhin)                                  | +2.4 | childhood cirrhosis                                                             |
| noc2l: nucleolar complex associated 2 homolog ( <i>S. cerevisiae</i> )              | +2.3 |                                                                                 |
| mphosp: M-phase phosphoprotein 10 (U3 small nucleolar ribonucleoprotein)            | +2.6 |                                                                                 |
| mki67ip: MKI67 (FHA domain) interacting nucleolar phosphoprotein                    | +2.2 |                                                                                 |
| rp9: retinitis pigmentosa 9 (autosomal dominant)                                    | +1.8 | target protein for the PIM1 kinase                                              |
| pno1: partner of NOB1 homolog ( <i>S. cerevisiae</i> )                              | +1.5 |                                                                                 |
| lyar: Ly1 antibody reactive homolog (mouse)                                         | +1.9 | cell growth-regulating nucleolar protein                                        |
| wdr3: WD repeat domain 3                                                            | +2.6 | cell cycle, signal transduction, apoptosis                                      |
| mki67ip: MKI67 (FHA domain) interacting nucleolar phosphoprotein                    | +2.2 | nucleolar protein interacts with FHA domain of pKI-67                           |
| gnl3: guanine nucleotide binding protein-like 3 (nucleolar)                         | +1.3 | G protein shuttle nucleus – nucleolus, proliferation                            |
| <b>RNA PROCESSING</b>                                                               |      |                                                                                 |
| sfrs2ip: splicing factor, arginine/serine-rich 2, interacting protein               | +1.5 | alternative splicing                                                            |
| sf3a1: splicing factor 3a, subunit 1                                                | +1.4 | subunits of SF3A required for 'A'                                               |
| sf3a3: splicing factor 3a, subunit 3                                                | +1.3 | complex assembly                                                                |
| sfrs11: splicing factor, arginine/serine-rich 11                                    | +1.3 | may function in pre-mRNA splicing                                               |
| sf3b5: splicing factor 3b, subunit 5                                                | -1.3 | with SF3A and 12SRNA form U2 complex                                            |
| sfrs3b: splicing factor, arginine/serine-rich 3b                                    | -1.3 | splicing related to cellular proliferation                                      |
| sfrs5: splicing factor, arginine/serine-rich 5                                      | -1.3 | alternative splicing,                                                           |
| sfrs7: splicing factor, arginine/serine-rich 7                                      | +1.4 | splicing, alternative splicing                                                  |
| ppan: peter pan homolog ( <i>Drosophila</i> )                                       | +2.4 | second step of mRNA splicing                                                    |
| snupn: snurportin 1                                                                 | +2.2 | U snRNP nuclear import                                                          |
| tnpo3: transportin 3                                                                | +2.2 | nuclear import splicing factors                                                 |
| sip1: survival of motor neuron protein interacting protein 1                        | +2.1 | spliceosomal snRNP assembly                                                     |
| a2bp1: ataxin 2-binding protein 1                                                   | -2.2 | alternative splicing                                                            |

|                                                                          |      |                                                                              |
|--------------------------------------------------------------------------|------|------------------------------------------------------------------------------|
| lsm8: LSM8 homolog, U6 small nuclear RNA associated                      | -1.8 | U4/U6 duplex formation                                                       |
| prpf38b: PRP38 pre-mRNA processing factor 38 domain containing B         | +1.8 | potential role in splicing                                                   |
| prpf38a: PRP38 pre-mRNA processing factor 38 domain containing A         | +1.4 |                                                                              |
| prpf6: PRP6 pre-mRNA processing factor 6 homolog                         | +1.3 | pre-mRNA processing                                                          |
| nhp21: NHP2 non-histone chromosome protein 2-like 1 (S. cerevisiae)      | +1.7 | spliceosome assembly                                                         |
| casc3: cancer susceptibility candidate 3                                 | +1.5 | exon junction complex, NMD                                                   |
| clk4: CDC-like kinase 4                                                  | -1.7 | phosphorylates ser/arg in spliceosome                                        |
| tnrc4: trinucleotide repeat containing 4                                 | -1.6 | pre mRNA alternative splicing                                                |
| pu60: poly-U binding splicing factor 60KDa                               | +1.3 | splicing                                                                     |
| prpf19: PRP19/PSO4 pre-mRNA processing factor 19 homolog (S. cerevisiae) | +1.3 | role in DNA DSB repair, spliceosome assembly, increases resistance to stress |
| rbm28: RNA binding motif protein 28                                      | +1.9 | nucleolar component of the spliceosome                                       |
| snrpf: small nuclear ribonucleoprotein polypeptide F                     | +1.3 | spliceosome                                                                  |
| snrpe: small nuclear ribonucleoprotein polypeptide E                     | +1.5 | spliceosome                                                                  |
| snrpb: small nuclear ribonucleoprotein polypeptide B                     | +1.3 | spliceosome                                                                  |
| hnnpa0: heterogeneous nuclear ribonucleoprotein A0                       | -1.6 | component of ribonucleosomes                                                 |
| dcp2: DCP2 decapping enzyme homolog (S. cerevisiae)                      | -1.3 | degradation of mRNAs, caps removal                                           |
| cugbp2: CUG triplet repeat, RNA binding protein 2                        | -1.3 | pre-mRNA alternative splicing                                                |
| cstf3: cleavage stimulation factor, 3' pre-RNA, subunit 3, 77kDa         | +1.7 | polyadenylation and cleavage pre-mRNAs                                       |
| cpsf3: cleavage and polyadenylation specific factor 3, 73kDa             | +1.5 | recognizes AAUAAA signal sequence pre-mRNA 3'-end formation                  |
| bcas2: breast carcinoma amplified sequence 2                             | +1.3 | spliceosome associated                                                       |
| fip111: FIP1 like 1 (S. cerevisiae)                                      | +1.5 | subunit of the CPSF complex that polyadenylates mRNA precursors.             |
| ddx27: DEAD (Asp-Glu-Ala-Asp) box polypeptide 27                         | +2.5 | RNA helicase                                                                 |
| ddx18: DEAD (Asp-Glu-Ala-Asp) box polypeptide 18                         | +2.3 | RNA helicase                                                                 |
| ddx55: DEAD (Asp-Glu-Ala-Asp) box polypeptide 55                         | +2.2 | RNA helicase                                                                 |
| ddx49: DEAD (Asp-Glu-Ala-Asp) box polypeptide 49                         | +2.1 | RNA helicase                                                                 |
| ddx56: DEAD (Asp-Glu-Ala-Asp) box polypeptide 56                         | +1.8 | RNA helicase                                                                 |
| ddx19: DEAD (Asp-Glu-Ala-Asp) box polypeptide 19                         | +1.4 | RNA helicase                                                                 |
| ddx21: DEAD (Asp-Glu-Ala-Asp) box polypeptide 21                         | +1.4 | RNA helicase                                                                 |
| ddx3y: DEAD (Asp-Glu-Ala-Asp) box polypeptide 3, Y-linked                | +2.1 | RNA helicase                                                                 |
| ddx47: DEAD (Asp-Glu-Ala-Asp) box polypeptide 47                         | +2.1 | RNA helicase                                                                 |
| <b>tRNA SYNTHESIS</b>                                                    |      |                                                                              |
| rars: arginyl-tRNA synthetase                                            | +3.1 | tRNA synthesis                                                               |
| qars: glutaminyl-tRNA synthetase                                         | +2.6 | tRNA synthesis                                                               |
| qars: glutaminyl-tRNA synthetase                                         | +2.5 | tRNA synthesis                                                               |
| iars: isoleucyl-tRNA synthetase                                          | +2.4 | tRNA synthesis                                                               |
| farsa: phenylalanyl-tRNA synthetase, alpha subunit                       | +2.3 | tRNA synthesis                                                               |
| farsb: phenylalanyl-tRNA synthetase, beta subunit                        | +2.6 | tRNA synthesis                                                               |
| kars: lysyl-tRNA synthetase                                              | +2.1 | tRNA synthesis                                                               |
| tyw1: tRNA-yW synthesizing protein 1 homolog (S. cerevisiae)             | +2.1 | tRNA synthesis                                                               |
| lars: leucyl-tRNA synthetase                                             | +2.1 | tRNA synthesis                                                               |
| hars: histidyl-tRNA synthetase                                           | +1.8 | tRNA synthesis                                                               |
| nars: asparaginyl-tRNA synthetase                                        | +1.8 | tRNA synthesis                                                               |
| tars: threonyl-tRNA synthetase                                           | +2.0 | tRNA synthesis                                                               |
| yars: tyrosyl-tRNA synthetase                                            | +2.8 | tRNA synthesis                                                               |
| cars: cysteinyl-tRNA synthetase                                          | +1.6 | tRNA synthesis                                                               |
| eprs: glutamyl-prolyl-tRNA synthetase                                    | +1.7 | tRNA synthesis                                                               |
| qtrtd1: queuine tRNA-ribosyltransferase domain containing 1              | +2   | tRNA synthesis                                                               |
| pop7: processing of precursor 7, ribonuclease P family                   | -1.9 | cleaves tRNA 5'-end make mature tRNA                                         |
| jtv1: JTV1 gene                                                          | +1.6 | the tRNA synthetase cofactor                                                 |
| trmt1: TRM1 tRNA methyltransferase 1 homolog (S. cerevisiae)             | +2.5 | dimethylates G at position 26 of tRNAs                                       |
| <b>TRANSLATION</b>                                                       |      |                                                                              |
| eif6: eukaryotic translation initiation factor 6                         | +2.7 | translation initiation                                                       |
| eif2b1: eukaryotic translation initiation factor 2B, subunit 1 alpha     | +2.5 | translation initiation                                                       |
| eif2b3: eukaryotic translation initiation factor 2B, subunit 3 gamma     | +1.4 | translation initiation                                                       |
| eif2b4: eukaryotic translation initiation factor 2B, subunit 4 delta     | +2.3 | translation initiation                                                       |



|                                                                            |      |                                                                                       |
|----------------------------------------------------------------------------|------|---------------------------------------------------------------------------------------|
| eif4ebp3: eukaryotic translation initiation factor 4E binding protein 3    | +2.1 | translation regulator                                                                 |
| eif2b2: eukaryotic translation initiation factor 2B, subunit 2 beta        | +2.0 | translation initiation                                                                |
| eif3j: eukaryotic translation initiation factor 3, subunit J               | +1.9 | translation initiation                                                                |
| eif5b: eukaryotic translation initiation factor 5B                         | +1.8 | translation initiation                                                                |
| eif2a: eukaryotic translation initiation factor 2A                         | +1.8 | translation initiation                                                                |
| eif2s2: eukaryotic translation initiation factor 2, subunit 2 beta         | +1.7 | translation initiation                                                                |
| eif2s1: eukaryotic translation initiation factor 2, subunit 1 alpha        | +1.3 | translation initiation                                                                |
| eif3c: eukaryotic translation initiation factor 3, subunit C               | +1.7 | translation initiation                                                                |
| eif2b5: eukaryotic translation initiation factor 2B, subunit 5 epsilon     | +1.6 | translation initiation                                                                |
| eif3g: eukaryotic translation initiation factor 3, subunit G               | +1.4 | translation initiation                                                                |
| eif3d: eukaryotic translation initiation factor 3, subunit D               | +1.4 | translation initiation                                                                |
| eif5: eukaryotic translation initiation factor 5                           | +1.4 | translation initiation                                                                |
| eif2b3: eukaryotic translation initiation factor 2B, subunit 3 gamma       | +1.4 | translation initiation                                                                |
| eif3b: eukaryotic translation initiation factor 3, subunit B               | +1.3 | translation initiation                                                                |
| eif3a: eukaryotic translation initiation factor 3, subunit A               | +1.3 | translation initiation                                                                |
| eif2s1l: eukaryotic translation initiation factor 2, subunit 1 alpha, like | +1.3 | translation initiation                                                                |
| eif3h: eukaryotic translation initiation factor 3, subunit H               | +1.3 | translation initiation                                                                |
| eif4g2b: eukaryotic translation initiation factor 4, gamma 2b              | +1.3 | translation initiation                                                                |
| eif2s1: eukaryotic translation initiation factor 2, subunit 1 alpha        | +1.3 | translation initiation                                                                |
| eif3s10: eukaryotic translation initiation factor 3, subunit 10 (theta)    | +1.3 | translation initiation                                                                |
| eif4ah: eukaryotic translation initiation factor 4H                        | +1.3 | translation initiation                                                                |
| eif1ay: eukaryotic translation initiation factor 1A, Y-linked              | +1.3 | translation initiation                                                                |
| eif1ax: eukaryotic translation initiation factor 1A, X-linked              | +1.4 | translation initiation                                                                |
| eif4a2: eukaryotic translation initiation factor 4A, isoform 2             | -1.6 | translation initiation                                                                |
| eif4a1b: eukaryotic translation initiation factor 4A, isoform 1B           | -1.4 | translation initiation                                                                |
| eef1g: eukaryotic translation elongation factor 1 gamma                    | -1.3 | translation regulator                                                                 |
| eef2: eukaryotic translation elongation factor 2                           | -1.5 | translation regulator                                                                 |
| etf1: eukaryotic translation termination factor 1                          | +1.5 | translation regulator                                                                 |
| dohh: deoxyhypusine hydroxylase/monooxygenase                              | +1.8 | post-translational modification of eIF-5A                                             |
| ngdn: neuroguidin, EIF4E binding protein                                   | +2.9 | binds EIF4E and CREB, translation                                                     |
| metap1: methionyl aminopeptidase 1                                         | +2.2 | removes Met from peptides                                                             |
| metap2: methionyl aminopeptidase 2                                         | +1.6 | removes Met from peptides                                                             |
| mknk2b: MAP kinase-interacting serine/threonine kinase 2b                  | +2.6 | phosphorylates EIF4E                                                                  |
| bzw2: basic leucine zipper and W2 domains 2                                | -1.6 | translation regulator                                                                 |
| brunol4: bruno-like 4, RNA binding protein (Drosophila)                    | -1.8 | translation regulator                                                                 |
| rps6kb1: ribosomal protein S6 kinase, 70kDa, polypeptide 1                 | +1.6 | translation regulator                                                                 |
| dohh: deoxyhypusine hydroxylase/monooxygenase                              | +1.8 | forms a.a. hypusine only found in elf5A                                               |
| denr: density-regulated protein                                            | +1.3 | translational initiation                                                              |
| csd1: cold shock domain containing E1, RNA-binding                         | +1.3 | translationally coupled mRNA turnover                                                 |
| mknk2: MAP kinase interacting serine/threonine kinase 2                    | +2.9 | stress, regul translation by phosphorylating EIF4E increasing its binding to mRNA cap |
| OTHERS                                                                     |      |                                                                                       |
| LOC563247: similar to ribosomal L1 domain containing 1                     | +2.6 | ribosome structural constituent                                                       |
| rpl7l1: ribosomal protein L7-like 1                                        | +1.7 | 60S subunit, glucose metabolism                                                       |
| rps27l: ribosomal protein S27-like                                         | +4.4 |                                                                                       |
| rrsl1d1: ribosomal L1 domain containing 1                                  | +2.6 |                                                                                       |
| rbpl1: ribosome binding protein 1 homolog (dog)                            | +2.4 | interaction between the ribosome and the endoplasmic reticulum                        |

## Supplemental Table 5

Expression of genes affecting various aspects of development and functions of tissues and organs

| gene                                                                       | fold  | function                                      |
|----------------------------------------------------------------------------|-------|-----------------------------------------------|
| NEURAL                                                                     |       |                                               |
| otx2: orthodenticle homolog 2                                              | -2    | development of brain and sense organs         |
| ntn1b: netrin 1b                                                           | - 5.6 | guidance of commissural and motor axons       |
| foxp2: forkhead box P2                                                     | -5.4  | brain development                             |
| atoh2a: atonal homolog 2a                                                  | -5.3  | brain development                             |
| lmo3: LIM domain only 3                                                    | -2.7  | brain development                             |
| otx5: orthodenticle homolog 5                                              | -3.5  | pineal and parapineal development             |
| crx: cone-rod homeobox                                                     | -11   | eye                                           |
| crygm2c: crystallin, gamma M2c                                             | -12   | eye lens                                      |
| crystallin, gamma B                                                        | -7.8  | eye lens                                      |
| crystallin, gamma M2d7                                                     | -5.5  | eye lens                                      |
| crystallin, gamma M2d1                                                     | -3.9  | eye lens                                      |
| cryba4: crystallin, beta A4                                                | -3.1  | eye lens                                      |
| crybb1: crystallin, beta B1                                                | -2.5  | eye lens                                      |
| crygs1: crystallin, gamma S1                                               | -2    | eye lens                                      |
| six7: sine oculis homeobox homolog 7                                       | -7.9  | eye                                           |
| six3a: sine oculis homeobox homolog 3a                                     | -1.6  | eye                                           |
| vsx1: visual system homeobox 1 homolog, chx10-lik                          | -6.3  | eye                                           |
| pde6g: phosphodiesterase 6G, cGMP-specific, rod, gamma                     | -3.9  | eye                                           |
| elavl4:embryonic lethal, abnormal vision 4 (Hu antigen D)                  | -2.4  | eye                                           |
| elavl1:embryonic lethal, abnormal vision (Drosophila)-like1 (Hu antigen R) | -1.3  | eye                                           |
| myoc: myocilin                                                             | -2.3  | eye trabecular meshwork,intraocular pressure  |
| mab2111: mab-21-like 1                                                     | -2.4  | eye and cerebellum development                |
| mab2112: mab-21-like 2                                                     | -2.2  | eye and cerebellum development                |
| pax6a: paired box gene 6a                                                  | -1.4  | eye                                           |
| olfm13: olfactomedin-like 3                                                | -3.0  | olfactory                                     |
| olfm2: olfactomedin 2                                                      | -2.3  | olfactory                                     |
| or103-4:odorant receptor, family C, subfamily 103, mem 4                   | -2.1  | olfactory                                     |
| pcp4a: Purkinje cell protein 4a                                            | -4.2  | nervous system development                    |
| snap25b: synaptosome-associated protein 25 b                               | -3.1  | transporter, nervous system                   |
| neurod: neurogenic differentiation                                         | -3.9  | nervous system development                    |
| nxph1: neurexophilin 1                                                     | -2.5  | nervous system development                    |
| cbln1: cerebellin 1 precursor                                              | -2.4  | nervous system development                    |
| fabp7a: fatty acid binding protein 7, brain, a                             | -2.4  | transporter, nervous system                   |
| syt1: Synaptotagmin I                                                      | -2.3  | nervous system development                    |
| gbx2: gastrulation brain homeo box 2                                       | -2.2  | nervous system development                    |
| slc1a2: solute carrier family 1, 2                                         | -2.2  | glial high affinity glutamate transporter     |
| slc32a1: solute carrier family 32 , member 1                               | -2.2  | GABA vesicular transporter                    |
| slc6a1: solute carrier family 6, member 1                                  | -3.5  | neurotransmitter transporter, GABA            |
| crip2: cysteine-rich protein 2                                             | -4.4  | intestinal neurons                            |
| pbx3b: pre-B-cell leukemia transcription factor 3b                         | -3.1  | Medulla oblongata neurons, respiration        |
| CH211-69I14.7: novel similar to pannexin 1 (PANX1)                         | -2.7  | CNS gap junctions                             |
| sreb2: sreb2 /// similar to sreb2                                          | -2.8  | Conserved brain receptor                      |
| gpm6ba: glycoprotein M6Ba                                                  | -2.8  | nervous system development                    |
| gpm6ab: glycoprotein M6Ab                                                  | -1.9  | nervous system development                    |
| barhl2 /// LOC100002240: BarH-like 2                                       | -2.6  | neural basic helix-loop-helix genes regulator |
| nell2b: NEL-like 2b                                                        | -2.1  | growth differentiation, brain                 |
| sox4a: SRY (sex determining region Y)-box 4a                               | -2.1  | expressed in brain in zebrafish               |
| meis2.2: myeloid ecotropic viral integration site 2.2                      | -2.1  | brain development                             |
| meis2.1: myeloid ecotropic viral integration site 2.1                      | -1.7  | brain, limb, regulates pax6                   |
| prph: peripherin                                                           | -2.1  | neurofilament                                 |
| gng3: guanine nucleotide binding protein (G protein), gamma 3              | -2.0  | mostly brain expression, low in others,       |
| lmo1: LIM domain only 1                                                    | -2.0  | adipose                                       |
| nrxn1a: neurexin 1a                                                        | -2.0  | neural, translocation in T cell leukemia      |
| lhx1a: LIM homeobox 1a                                                     | -2.0  | cell adhesion molecules and receptors         |

|                                                                                                 |      |                                                                                         |
|-------------------------------------------------------------------------------------------------|------|-----------------------------------------------------------------------------------------|
| lhx5: LIM homeobox 5                                                                            | -1.5 | differentiation and development of forebrain                                            |
| dpysl3: dihydropyrimidinase-like 3                                                              | -2.0 | differentiation of neurons and lymphoid cells                                           |
| robo1: roundabout, axon guidance receptor, homolog 1 (Drosophila)                               | -1.3 | axon guidance transmembrane receptor                                                    |
| robo2: roundabout homolog 2                                                                     | -1.9 | semaphoring signaling, cytoskeleton rearrange                                           |
| gad1: glutamate decarboxylase 1                                                                 | -1.9 | axon guidance                                                                           |
| ncgb: synuclein, gamma b (breast cancer-specific protein 1)                                     | -1.8 | GABA synthesis, deficiency - seizures                                                   |
| tmem59l: transmembrane protein 59-like                                                          | -1.8 | expressed in CNS                                                                        |
| isl1: islet1                                                                                    | -1.9 | may play a role in brain                                                                |
| mdkb: midkine-related growth factor b                                                           | -1.7 | neurons, also regulates insulin promoter                                                |
| emx2: empty spiracles homeobox 2                                                                | -1.7 | neurite outgrowth, cell fate, coop with otx2                                            |
| dpysl5a: dihydropyrimidinase-like 5a                                                            | -1.6 | brain development, partnerEMX2                                                          |
| dmbx1: diencephalon/mesencephalon homeobox 1                                                    | -1.8 | brain development                                                                       |
| negr1: neuronal growth regulator 1                                                              | -1.5 |                                                                                         |
| ncam1: neural cell adhesion molecule 1                                                          | -1.3 |                                                                                         |
| snca: synuclein, alpha (non A4 component of amyloid precursor)                                  | -1.8 | in brain, inhibit phospholipase D2 selectively                                          |
| sncb: synuclein, beta                                                                           | -2.2 | in brain, inhibit phospholipase D2 selectively                                          |
| sgs5: secretogranin V (7B2 protein)                                                             | -1.8 | pituitary hormone secretion                                                             |
| rtn1: reticulon 1                                                                               | -1.4 | neuroendocrine secretion                                                                |
| rgma: RGM domain family, member A                                                               | -1.4 | guidance of growth cones                                                                |
| mab2111: mab-21-like 1 (C. elegans)                                                             | -2.4 | TGFb target, cell fate-determining gene, eye                                            |
| mab2112: mab-21-like 2 (C. elegans)                                                             | -2.2 | cell fate-determining gene, eye                                                         |
| lgi1: leucine-rich, glioma inactivated 1                                                        | -1.3 | autosomal dominant lateral temporal epilepsy                                            |
| hmp19: HMP19 protein                                                                            | -1.9 | hypothalamus golgi apparatus expressed                                                  |
| gdi1: GDP dissociation inhibitor 1                                                              | -2.1 | GDP/GTP exchange, neural cells                                                          |
| gap43: growth associated protein 43                                                             | -1.4 | In growing and regenerating neural cells                                                |
| clstn1: calsynenin 1                                                                            | -1.5 | cargo in axonal anterograde transport                                                   |
| cldn11: claudin 11 (oligodendrocyte transmembrane protein)                                      | -1.7 | oligodendrocyte tight junctions                                                         |
| cdr2l: cerebellar degeneration-related protein 2-like                                           | -1.8 |                                                                                         |
| cdk5r2: cyclin-dependent kinase 5, regulatory subunit 2 (p39)                                   | -1.7 | neuron-specific activator of CDK5 kinase                                                |
| atacy: ataxia, cerebellar, Cayman type                                                          | -1.4 | neuron-spec. bind small lipophilic molecules                                            |
| armet: arginine-rich, mutated in early stage tumors                                             | -2.2 | survival of dopaminergic neurons                                                        |
| anp32e: acidic (leucine-rich) nuclear phosphoprotein 32 family, member E                        | -1.3 | cerebellar development and synaptogenesis                                               |
| nr2e3: nuclear receptor subfamily 2, group E, member 3                                          | -3.9 | retinal nuclear receptor                                                                |
| sox11a: SRY (sex determining region Y)-box 11a                                                  | -1.4 | function in the developing nervous system                                               |
| mdkb: midkine-related growth factor b                                                           | -1.7 | fetal adrenal gland development                                                         |
| bre: brain and reproductive organ-expressed (TNFRSF1A modulator)                                | -1.5 | modulation of E3 ubiquitin ligase activity of the 2-subunit BRCA1/BARD1 complex         |
| drysl3: dihydropyrimidinase-like 3                                                              | -2   | axon guidance, neur. growth cell migration                                              |
| drysl5: dihydropyrimidinase-like 5                                                              | -1.6 | neuronal differentiation and/or axon growth                                             |
| sept8: septin 8 (septins are GTPases that assemble as filamentous scaffolds)                    | +1.4 | organization of submembranous structures, in neuronal polarity, and vesicle trafficking |
| ascl1a: achaete-scute complex-like 1a (Drosophila)                                              | +2.5 | brain development                                                                       |
| lrrn1: leucine rich repeat neuronal 1                                                           | +2.2 | neurons, olfactory development                                                          |
| neurog1: neurogenin 1                                                                           | +2   | inhibitors of neural development                                                        |
| her9: hairy-related 9                                                                           | +1.6 |                                                                                         |
| her2: hairy-related 2                                                                           | +3.5 |                                                                                         |
| her8a: hairy-related 8a                                                                         | +3.3 |                                                                                         |
| hes5: hairy and enhancer of split 5                                                             | +1.9 |                                                                                         |
| ntn1a: netrin 1a                                                                                | +2   | laminin-like axon guidance                                                              |
| dbx1a: developing brain homeobox 1a                                                             | +1.8 | ventral interneurons                                                                    |
| metrn: meteorin, glial cell differentiation regulator                                           | +1.8 | promotes astrocyte differentiation                                                      |
| sox19a: SRY-box containing gene 19a                                                             | +1.7 |                                                                                         |
| ptprn: protein tyrosine phosphatase, receptor type, N                                           | +1.7 | neuroendocrine function                                                                 |
| myef2: myelin expression factor 2                                                               | +1.3 |                                                                                         |
| sip1: survival of motor neuron protein interacting protein 1                                    | +2.1 |                                                                                         |
| slit homolog 2 (Drosophila)                                                                     | +1.3 | molecular guidance cue in cellular migration                                            |
| rtc4: reticulon 4                                                                               | +1.3 | neurite growth inhibitor                                                                |
| plp1: proteolipid protein 1 (Pelizaeus-Merzbacher disease, spastic paraplegia 2, uncomplicated) | +1.3 | major myelin protein central nervous system                                             |

|                                                           |      |                                                                                     |
|-----------------------------------------------------------|------|-------------------------------------------------------------------------------------|
| olig3: oligodendrocyte transcription factor 3             | +3.1 | promotes class A neurons, spinal cord and suppress specification of class B neurons |
| ncald: neurocalcin delta                                  | +1.6 | Ca-dependent rhodopsin phosphorylation                                              |
| ifrd1: interferon-related developmental regulator 1       | +1.3 | NGF response                                                                        |
| angptl7: angiopoietin-like 7                              | +1.5 | Cornea                                                                              |
| sox3: SRY (sex determining region Y)-box 3                | +1.5 | X-linked mental retardation with GH deficiency                                      |
| ascl1: achaete-scute complex homolog 1 (Drosophila)       | +2.5 | Differentiation of some neural lineages                                             |
| ptprn: protein tyrosine phosphatase, receptor type, N     | +1.7 | neuroendocrine secretory processes                                                  |
| reep3: receptor accessory protein 3                       | +1.5 | may enhance cell surface expression of odorant receptors                            |
| <b>RETINOL-BINDING</b>                                    |      |                                                                                     |
| rlbp11: retinaldehyde binding protein 1, like             | -7.5 | retinoic acid transport and metabolism                                              |
| rbp2a: retinol binding protein 2a                         | -6.9 | retinoic acid transport and metabolism                                              |
| crabp1a: cellular retinoic acid binding protein           | -5.8 | retinoic acid transport and metabolism                                              |
| crabp2a: cellular retinoic acid binding protein 2, a      | +1.6 | transports retinoic acid to the nucleus                                             |
| rbp4: retinol binding protein 4, plasma                   | -2.4 | retinoic acid transport and metabolism                                              |
| rarga: retinoic acid receptor gamma a                     | -1.4 | retinoic acid transport and metabolism                                              |
| tgif1: TGFB-induced factor homeobox 1                     | +1.7 | inhibits 9-cis-retinoic acid-dependent RXRa                                         |
| <b>VARIOUS TISSUES</b>                                    |      |                                                                                     |
| gsc: goosecoid                                            | -3.5 | various embryonic structures                                                        |
| runx2a: runt-related transcription factor 2a              | -3.2 | osteoblast/skeletal differentiation                                                 |
| irx4a: iroquois homeobox protein 4a                       | -2.6 | cardiac development                                                                 |
| fli1a / LOC100001509: friend leukemia integration 1a      | -1.7 | mesoderm, vascular                                                                  |
| pbx1a: pre-B-cell leukemia transcription factor 1a        | -3.2 | steroidogenesis                                                                     |
| dlx4a: distal-less homeobox gene 4a                       | -2.4 | pharyngeal arches                                                                   |
| aqp3: aquaporin 3                                         | -2.1 | water-specific channel kidney                                                       |
| wif1: wnt inhibitory factor 1                             | +2.6 | mesoderm segmentation                                                               |
| pax2b: paired box gene 2b                                 | +2.4 | kidney, urogenital tract, eyes, and the CNS                                         |
| ncl1: nicalin                                             | +2.1 | antagonize Nodal, axial structures                                                  |
| shha : sonic hedgehog a                                   | +1.5 | many tissues                                                                        |
| sufu: suppressor of fused homolog (Drosophila)            | +1.6 | negative regulator in the hh pathway                                                |
| hhp: hedgehog interacting protein                         | +1.9 | modulates hedgehog signaling                                                        |
| notch1a: notch homolog 1a                                 | +2.5 | cell fate, differentiation                                                          |
| dlb: DeltaB                                               | +2.4 | cell fate, differentiation                                                          |
| dld: deltaD                                               | +2.4 | cell fate, differentiation                                                          |
| dll1: delta-like 1 (Drosophila)                           | +2.1 | cell fate, differentiation                                                          |
| nrarpb: notch-regulated ankyrin repeat protein b          | +2.2 | cell fate, differentiation                                                          |
| notch3: Notch homolog 3 (Drosophila)                      | +1.6 | fucos EGF-like repeats of extracellular Notch                                       |
| lfng: lunatic fringe homolog, fucose glycosyltransferase  | +2.4 | heart muscle, cardioplipin metabolism                                               |
| taz: tafazzin                                             | +2.4 | vasculogenesis                                                                      |
| vegfa: vascular endothelial growth factor A               | +2.7 | otoconia, vestibular macular organs                                                 |
| oc90: otoconin 90                                         | -1.9 | chondrocyte growth, inhibits angiogenesis                                           |
| lect1: leukocyte cell derived chemotaxin 1                | -1.9 | circadian clock                                                                     |
| csnk1da: casein kinase 1, delta a                         | -1.7 | reduced in cancers                                                                  |
| gng7: guanine nucleotide binding protein (G protein), g 7 | +2.1 | timing of organ development                                                         |
| trim71: tripartite motif-containing 71                    | +2.1 | may antagonize nodal                                                                |
| ncl1: nicalin                                             | +1.9 | major connective tissue mitoattractant                                              |
| ctgf: connective tissue growth factor                     | +1.9 | blue light-dependent regulator feedback loop                                        |
| cry3: Cryptochrome 3 (circadian clock)                    | +1.6 | adipocytes                                                                          |
| klf3: Kruppel-like factor 3 (basic)                       | +1.3 |                                                                                     |
| klf6: Kruppel-like factor 6                               | +1.6 | germ-cell specific                                                                  |
| papolb: poly(A) polymerase beta (testis specific)         | +1.6 | germ cells adhesion migration                                                       |
| cd9l: CD9 antigen, like                                   | +1.4 | transcription regulator                                                             |
| tef: thyrotroph embryonic factor                          | +1.4 |                                                                                     |
| myod1: myogenic differentiation 1                         | +1.6 |                                                                                     |
| mynn: myoneurin                                           | -1.9 |                                                                                     |
| lmo4: LIM domain only 4                                   | +1.4 |                                                                                     |

|                                                                                                |      |                                                                             |
|------------------------------------------------------------------------------------------------|------|-----------------------------------------------------------------------------|
| irx3: iroquois homeobox 3                                                                      | -1.7 |                                                                             |
| hey1: hairy/enhancer-of-split related with YRPW motif 1                                        | +2.3 |                                                                             |
| pes1: pescadillo homolog 1, containing BRCT domain (zebrafish)                                 | +1.3 | specification of dorsal limb fate                                           |
| nps1: RNA binding protein S1, serine-rich domain                                               | +1.7 | placenta development                                                        |
| phlda2: pleckstrin homology-like domain, family A, member 2                                    | +2.1 |                                                                             |
| phlda3: pleckstrin homology-like domain, family A, member 3                                    | +2.0 | muscle-specific                                                             |
| murc: muscle-restricted coiled-coil protein                                                    | -2.5 | deficiency –deafness                                                        |
| lhfp13: lipoma HMGIC fusion partner-like 3                                                     | +1.6 | skeletal and cardiac muscle                                                 |
| ifrd2: interferon-related developmental regulator 2                                            | +1.3 | basement membranes in kidney                                                |
| cd151: CD151 molecule (Raph blood group)                                                       | +1.6 | angiogenesis and cell migration                                             |
| aamp: angio-associated, migratory cell protein                                                 | -1.7 | organogenesis and differentiation                                           |
| rora: RAR-related orphan receptor A                                                            | -1.4 | differentiation of endothelial cells                                        |
| s1pr1: sphingosine-1-phosphate receptor 1                                                      | +2.8 | maintenance of blood pressure and extracellular fluid volume                |
| npr3: natriuretic peptide receptor C/guanylate cyclase C (atrionatriuretic peptide receptor C) | -1.8 | may play a role in chondrogenesis                                           |
| sox5: SRY (sex determining region Y)-box 5                                                     | +1.3 | maintain the transcriptionally repressive state of genes during development |
| phc2: polyhomeotic homolog 2 (Drosophila)                                                      | +1.5 | vascular, hematopoietic and neuronal develop                                |
| narg1a: NMDA receptor-regulated gene 1a                                                        | +1.8 | probable histone methyltransferase                                          |
| whsc1: Wolf-Hirschhorn syndrome candidate 1                                                    |      |                                                                             |

## Supplemental Table 6

### Expression of genes affecting function of blood and immune system

| gene                                                                                             | fold | function                                                                                       |
|--------------------------------------------------------------------------------------------------|------|------------------------------------------------------------------------------------------------|
| <b>BLOOD</b>                                                                                     |      |                                                                                                |
| klf11a: Kruppel-like factor 11a                                                                  | -3.5 | activates globin genes suppress growth                                                         |
| hbbe2: hemoglobin beta embryonic-2                                                               | -2.6 | oxygen transporter                                                                             |
| hbga: hemoglobin, gamma A                                                                        | -2.6 | oxygen transporter                                                                             |
| hbbe3: hemoglobin beta embryonic-3                                                               | +1.9 | oxygen transporter                                                                             |
| hbae1: hemoglobin alpha embryonic-1                                                              | -1.4 | oxygen transporter, qPCR data                                                                  |
| alas2: aminolevulinate, delta-, synthetase 2                                                     | -2.4 | heme biosynthesis                                                                              |
| mb: myoglobin                                                                                    | -1.4 | oxygen storage in muscle cells                                                                 |
| gpib: glucose phosphate isomerase b                                                              | -2.0 | platelet adhesion in the arterial circulation                                                  |
| fga: fibrinogen alpha chain                                                                      | +1.7 | blood clots: cleaved by thrombin form fibrin                                                   |
| fgb: fibrinogen, B beta polypeptide                                                              | +1.6 | blood clots                                                                                    |
| maea: macrophage erythroblast attacher                                                           | +1.5 | mediates the attachment of erythroid cell to macrophages This contact inhibits their apoptosis |
| arl6ip1: ADP-ribosylation factor-like 6 interacting protein 1                                    | -1.3 | hematopoietic maturation                                                                       |
| <b>IMMUNE</b>                                                                                    |      |                                                                                                |
| c6/LOC100003623: complement component 6                                                          | +3.2 | complement system                                                                              |
| clu: clusterin (complement lysis inhibitor, apolipoprotein J)                                    | +2.6 | complement system                                                                              |
| LOC100003961: similar to complement C3-H1                                                        | +1.4 | complement system                                                                              |
| LOC567902: similar to complement C3-S                                                            | +1.4 | complement system                                                                              |
| cfb: complement factor B                                                                         | +1.3 | complement system                                                                              |
| c8b: complement component 8, beta polypeptide                                                    | +1.4 | complement system                                                                              |
| serping1: serpin peptidase inhibitor, clade G (C1 inhibitor), member 1, (angioedema, hereditary) | +1.7 | inhibits activated C1r and C1s of complement                                                   |
| socs3a: suppressor of cytokine signaling 3a                                                      | +4.1 | INF signaling                                                                                  |
| socs3b: suppressor of cytokine signaling 3b                                                      | +3.2 | INF signaling                                                                                  |
| LOC796252: chemokine CXL-C24a                                                                    | -4.2 | chemokine                                                                                      |
| LOC795788: similar to CC chemokine SCYA103                                                       | -4.7 | chemokine                                                                                      |
| irf7: interferon regulatory factor 7                                                             | +5.3 | interferon-dependent responses                                                                 |
| gtpbp1: GTP binding protein 1                                                                    | +3   | interferon gamma target                                                                        |
| ifrd2: interferon-related developmental regulator 2                                              | +1.6 | INF signaling                                                                                  |
| irf2bp2: Interferon regulatory factor 2 binding protein 2                                        | -1.4 | INF signaling                                                                                  |
| ifi30: interferon gamma inducible protein 30                                                     | -1.4 | interferon inducible                                                                           |
| dap1b: death associated protein 1b                                                               | -1.5 |                                                                                                |
| prkri: protein-kinase, interferon-inducible dsRNA-dependent inhibitor                            | -1.7 | interferon-gamma-induced cell death                                                            |
| defb11: LOC100000966 / defensin, beta-like 1                                                     | -4.4 | antimicrobial peptide                                                                          |
| lyz: lysozyme                                                                                    | -1.5 | antimicrobial peptide                                                                          |
| cebpb: CCAAT/enhancer binding protein (C/EBP), beta                                              | +3.1 | activator immune/acute phase, inflammation                                                     |
| abce1:ATP-binding cassette, sub-family E (OABP) mem 1                                            | +1.6 | block activity ribonuclease L, antagonize IFN                                                  |
| lyzl2: lysozyme-like 2                                                                           | -1.5 |                                                                                                |
| prg2: plasticity-related gene 2                                                                  | -1.3 | cytotoxin and helminthotoxin                                                                   |
| nktr: natural killer-tumor recognition sequence                                                  | -1.5 | function of NK cells                                                                           |
| lrba: LPS-responsive vesicle trafficking, beach and anchor containing                            | +1.4 | Chediak-Higashi syndrome                                                                       |
| il17rd: interleukin 17 receptor D                                                                | +1.3 | Feedback inhibitor of fibroblast growth factor mediated Ras-MAPK signaling                     |
| cd68: CD68 molecule                                                                              | -1.3 | phagocytic activities of tissue macrophages                                                    |
| sqstm1: sequestosome 1                                                                           | +1.6 | binds ubiquitin, regulates activation of NFkB1                                                 |
| ptma: prothymosin, alpha                                                                         | -2.2 | interaction of hist 1 with chromatin, resistance to opportunistic infections                   |
| creb3: cAMP responsive element binding protein 3                                                 | +1.3 | establishment of latency during HSV infection                                                  |
| map7d1: MAP7 domain containing 1                                                                 | +2.4 | histamine receptor activity                                                                    |
| tnfrsf1a: tumor necrosis factor receptor superfamily, member 1A                                  | +2.1 | activate NF-kB, mediate apoptosis, and function as                                             |

|                                                                                         |      |                             |
|-----------------------------------------------------------------------------------------|------|-----------------------------|
| scye1: small inducible cytokine subfamily E, member 1 (endothelial monocyte-activating) | +1.7 | a regulator of inflammation |
|-----------------------------------------------------------------------------------------|------|-----------------------------|

**Supplemental Table S7. Primers used in qPCR.**

| gene                         | name          | Sequence                    |
|------------------------------|---------------|-----------------------------|
| Actin b                      | ac            | 5' -TCTCTTCCAGCCTTCCTTCCT   |
|                              | acr           | 5' -CTCATCGTACTCCTGCTTGCT   |
| p53                          | Dp53e (Delta) | 5' -ATATCCTGGCGAACATTTGG    |
|                              | p53er         | 5' -ACGTCCACCACCATTTGAAC    |
|                              | Fp53 (TA)     | 5' -CTCTCCCACCAACATCCACT    |
|                              | 53f           | 5' -CTGAAGTGGTCCGCAGATG     |
|                              | 53r           | 5' -CGTTTGGTCCCAGTGGTGG     |
| p63                          | 63f           | 5' -CCACATCACACTTTTAGGGG    |
|                              | 63r           | 5' -GAATCCTCCACGTATTGAGCG   |
| p73                          | p73           | 5' -TACTCGCAGCCAAACTCAACC   |
|                              | p73r          | 5' -AGGAGCCGTCTGACTTTCGT    |
| bax                          | bx            | 5' -CGTCGGGTGGAGGCGATACG    |
|                              | bxr           | 5' -GAGTCGGCTGAAGATTAGAGTT  |
| puma                         | zpm           | 5' -CCTCACATGATGCCTTCAGC    |
|                              | zpmr          | 5' -CATTGATGGTGTCCGAGACC    |
| p21                          | z21           | 5' -TGAGAACTTACTGGCAGCTTCA  |
|                              | z21r          | 5' -AGCTGCATTCGTCTCGTAGC    |
| adenosine<br>deaminase (ADA) | adf           | 5' -CCATCAAGAGAATAGCGTATG   |
|                              | adr           | 5' -GCTTCTTGTGTCCTGGGTA     |
| myb                          | mb            | 5' -AAGACAGGAAAACGCCACC     |
|                              | mbr           | 5' -TTGACATCAACAGCATCTCG    |
| gata1                        | gat           | 5' -CGACATCTTCAATACTACACTT  |
|                              | gatr          | 5' -TAGGGAGAGTTTAGAGAGTGA   |
| cyclin G1                    | G1f           | 5' -TCAAGAGAAAGTGGACACAGAAA |
|                              | G1r           | 5' -CATTGGCTTCTGGCACTTGG    |
| ankirin1                     | ank1          | 5' -GATGAGAGACTGCCGAACCA    |
|                              | ankr1         | 5' -GCCACTTCTCCTTGTTCCTGC   |
| stat3                        | stat3f        | 5' -GACACTGAGTTCCTTGACACA   |
|                              | stat3r        | 5' -CTTCTCTCATGGGTGACGCAT   |
| triosephosphate<br>isomerase | tri           | 5' -GTGTGGTCTTGGCGTATGAAC   |
|                              | trir          | 5' -GCGTCTGGTTGAGCATCTCTA   |
| pyruvate kinase              | pk            | 5' -CCATATCACCTGAGCGGAAGA   |
|                              | pkr           | 5' -CGAGTCCTCATACAAGTGCTG   |
| 6-phosphofructokinase        | pfk1          | 5' -CCAGACCAGAGAAGGGCGTTT   |
|                              | pfkr1         | 5' -TTGGTGGCTTTGTGCTGTTGT   |



|                                     |                    |                                                           |
|-------------------------------------|--------------------|-----------------------------------------------------------|
| hemoglobin embryonic<br>be3         | hbbe3<br>hbbe3r    | 5' -CGCAGCGATTTCAGAACATCTT<br>5' -CTGAGGGCTGACACAACAACA   |
| brf1                                | brf1<br>brflr      | 5' - CCTTTGTGGAGAGTGGCGGC<br>5' -GACGAGTGCTGATTTCATCTGAA  |
| runx1                               | runx<br>runxr      | 5' - CGGATGAAGCAGTAAAGCCAG<br>5' -GGTTGGGTGAGATTGGTGTTG   |
| caspase 8                           | cas8<br>cas8r      | 5' - GCACTACCTCTCCTACCGACA<br>5' - CACTTCAGTCTATGGGCAGCA  |
| vegf                                | vegf<br>vegfr      | 5' -CTCTCCTCCATCTGTCTGCTG<br>5' - CGCAGCACCTCCATAGTGAC    |
| goosecoid                           | gsc<br>gscr        | 5' - CAAGAGACGACACCGAACCAT<br>5' -CTCTGACGACGACCTTTTCTG   |
| p27                                 | p27<br>p27r        | 5' - GTGTGGATGAAGTGACCCGAA<br>5' -CTTTATTGTTGAGTGCCAGAAGT |
| notch1                              | notch1<br>notchl r | 5' -CAGATTGGAGGATTTCACTGC<br>5' -CCGTCACGACACACACCATAA    |
| hemoglobin embryonic<br>ae1         | hbae1<br>hbaelr    | 5' - CGCTGGAAAGGCTGACGACAT<br>5' - GCCAGAACCACGAGGATGTTG  |
| insulin                             | ins<br>insr        | 5' -gctctgttggtcctgttggt<br>5' - ggcagatttaggaggaagg      |
| cdc25                               | cdc25<br>cdc25r    | 5' - acctccattaccccgaactc<br>5' - ctgccatggctcatgttatg    |
| catalase                            | catz<br>catzr      | 5' - aactatttcgcgagggttga<br>5' - gcacatgggtccatctctct    |
| cyclin D1                           | d1-1<br>d1-1r      | 5' -ggagcaccagttgttttgct<br>5' -ggtgggctccacagataaaa      |
| pinx1                               | pinx<br>pinxr      | 5' -acaacacgggagaaccctacg<br>5' -catggtcagagagctggtca     |
| sox3a                               | sox3<br>sox3r      | 5' -ggaagacaagagccgagact<br>5' -ccttgagctgaaggtcttg       |
| triosephosphate<br>isomerase, mouse | m-tri<br>m-trir    | 5' -CGCAGATAATGTGAAAGACTG<br>5' -GGCATTGATGATGTCCACAAA    |
| ankirin1, mouse                     | m-ank<br>m-ankr    | 3' -GAGAGCAGGTGACGGAGGAA<br>5' -GACAGAGTGTGTGGAGTTCAG     |
| actin, mouse                        | m-ac<br>m-acr      | 5' -GGGTATGGAATCCTGTGGCA<br>5' -CATCTGCTGGAAGGTGGACA      |
